# Supplementary material
Source: PubMed Central journal article supplement (PMC5502827)

**SUPPLEMENTAL FIGURES AND TABLES:**

**Figure S1: Schematic diagrams summarizing the breakdown of participants enrolled in this study. (A)** Of the 102 asthmatic adults screened for this study, 42 atopic asthmatics (AAs) were enrolled. These subjects underwent specimen collection at baseline (prior to any treatment) and were then randomized to receive inhaled placebo or 250 mcg of fluticasone (ICS) twice daily for six weeks. **(B)** Of the 84 atopic non-asthmatic (ANAs) and non-atopic non-asthmatic healthy control (HCs) subjects screened, 21 from each group were enrolled in this study. **(C)** Enrolled participants were seen at multiple visits (indicated by arrows) in nine participating study centers, during which they underwent spirometry (S), methacholine provocation (MP), sputum induction (IS) and bronchoscopy (B). Following baseline assessment (visits 1 and 2) asthmatic patients underwent additional assessment post six weeks twice-daily treatment with ICS or placebo inhaler (post-treatment assessment visits 3 and 4). **(D)** A schematic diagram of the total bronchial brush samples (BBs) collected during bronchoscopy at baseline (visit 2) indicating the breakdown of subjects with sufficient bacterial 16S rRNA for bacterial profile. The proportion of sequenced to not-sequenced BB samples did not vary by subject group or clinical study site (<sup>#</sup>Chi-square test;  $p>0.5$ ). **(E)** Breakdown of BBs collected from asthmatics post-treatment (visit 4) showing the proportion of sequenced to not sequenced samples, which did not vary between type of inhaler used (<sup>&</sup>Fishers exact test;  $p>0.5$ ).

**Figure S2: (A)** Total serum IgE concentrations differentiate the three groups. **(B, C)** Atopic asthmatics show evidence of systemic eosinophilia. **(D)** Bacterial burden (normalized to  $\beta$ -actin expression) in sequenced samples was significantly higher than in non-sequenced samples. **(E)** Bacterial burden in the second scope flush was indistinguishable between a random subset of sequenced and non-sequenced samples, while their paired brush 16S rRNA burden was significantly higher for the sequenced samples. **(F)** Bacterial burden (normalized to  $\beta$ -actin expression) for sequenced samples did not significantly vary between study groups. **(G)** Bacterial richness did not significantly vary between study groups. **(H)** Bacterial diversity based on Shannon Index did not significantly vary between study groups. **(I)** Bacterial evenness based on Pielou's Index did not significantly vary between study groups. Statistical significance was determined using Wilcoxon rank sum test, <sup>&</sup>Wilcoxon matched-pairs signed rank test or <sup>\$</sup>Welch's corrected t-test.

**Figure S3.** The bronchial microbiota of all groups is highly heterogeneous, but compositional variability is higher in the atopic asthmatic subjects. Principal coordinate analysis plots based on unweighted UniFrac distance, where bronchial brush samples **(A)** from all subjects (28 atopic asthmatics – AA; 15 atopic non asthmatics – ANA; 13 healthy controls – HC) are colored by group, which does not explain variation in community composition (PERMANOVA  $p>0.05$ ); **(B)** from all subjects are colored by richness or **(C)** from AAs only colored by richness or **(D)** ANAs only colored by richness or **(E)** HC only colored by richness. Community richness (Observed species ranging from 219 to 1122 operational taxonomic units (OTUs), significantly explained variability in composition between samples in all groups (PERMANOVA,  $p\leq 0.01$ ). **(F)** Distance box plots based on weighted UniFrac distance matrix show greater compositional variability in the AA compared to both ANAs and HC subjects (F-test  $p<0.05$ ).

**Figure S4:** Summary of bacterial taxa at a phylum level, significantly enriched or depleted in relative abundance (at least 2 fold) in **(A)** atopic asthmatic (AAs) patients (n=28) compared to healthy control subjects (HC, n=13); **(B)** atopic non-asthmatic (ANAs) subjects (n=15) compared to HC subjects; **(C)** AAs patients compared to ANAs subjects. The number of operational taxonomic units (OTU) included in each phyla are indicated by #OTU. Statistical significance was determined using Negative binomial regression model corrected for false discovery rate ( $q < 0.1$ ).

**Figure S5:** **(A)** ICS-responders showed increase in the dose of methacholine in the PC<sub>20</sub> challenge after 6 weeks of treatment with fluticasone, but not ICS non-responders or asthmatics taking a placebo inhaler. **(B)** ICS-responders showed at least one doubling in the dose of methacholine after 6 weeks of treatment with fluticasone. **(C)** ICS-responders exhibited slightly higher T2-type inflammation at baseline compared to ICS non-responders. Subjects identified as T2-high asthmatics are colored in maroon. **(D)** ICS-responders showed significant decline in the three-gene signature after treatment with fluticasone compared to both ICS non-responders and placebo controls. Statistical significance was determined using Wilcoxon rank sum test and Wilcoxon matched-pairs rank sum test.

**Figure S6:** **(A)** Treatment with ICS had no significant effect on the change in bacterial burden compared to placebo inhaler. Statistical significance was determined using Wilcoxon rank sum test. **(B)** Treatment with ICS had no significant effect on the change in Faith's phylogenetic diversity compared to placebo inhaler. Statistical significance was determined using Wilcoxon rank sum test. **(C)** Procrustes analysis plot based on unweighted UniFrac distance of asthmatics taking placebo treatment (n = 8) shows no significant similarity in community composition between pre- and post-treatment paired samples ( $M^2 = 0.635$ ,  $p > 0.05$ ). **(D)** Procrustes analysis plot based on unweighted UniFrac distance shows no significant similarity in community composition between pre- and post-treatment paired samples ( $M^2 = 0.504$ ,  $p > 0.05$ ) in ICS-responders (n = 8). **(E)** Analysis of paired unweighted UniFrac distance shows no significant difference in the magnitude of the community shift identified with treatment using fluticasone or a lactose containing placebo inhaler. Statistical significance was determined using Wilcoxon rank sum test.

**Table S1:** Breakdown of sensitivities to specific aeroallergens in the atopic asthmatics and atopic non-asthmatic subjects.

| Variable          | Atopic asthmatics (n = 42) | Atopic non-asthmatics (n = 21) | Healthy controls (n = 21) | p-value <sup>#</sup> |
|-------------------|----------------------------|--------------------------------|---------------------------|----------------------|
| sIgE (Mite-1)     | 56%                        | 50%                            | -                         | NS                   |
| sIgE (Mite-2)     | 54%                        | 60%                            | -                         | NS                   |
| sIgE (Cat)        | 68%                        | 40%                            | -                         | <0.05                |
| sIgE (Dog)        | 59%                        | 32%                            | -                         | 0.05                 |
| sIgE (Mouse)      | 17%                        | 0%                             | -                         | 0.05                 |
| sIgE (Grass mix)  | 58%                        | 37%                            | -                         | NS                   |
| sIgE (Cockroach)  | 28%                        | 11%                            | -                         | NS                   |
| sIgE (Mold mix)   | 38%                        | 16%                            | -                         | NS                   |
| sIgE (Tree mix 1) | 42%                        | 21%                            | -                         | NS                   |
| sIgE (Tree mix 2) | 34%                        | 21%                            | -                         | NS                   |
| sIgE (Weed)       | 34%                        | 18%                            | -                         | NS                   |
| sIgE (Weed mix)   | 47%                        | 29%                            | -                         | NS                   |

Percentage of positive specific IgE (sIgE >0.35 kU/l) as tested by ImmunoCap assay. <sup>#</sup> Statistical significance was determined using Chi-square test.

**Table S2:** Responses to Prior clinical conditions questionnaire for atopic participants.

| Questions about Prior conditions                                                             | Atopic Asthmatics (n=42) | Atopic Non-asthmatics (n=21) | p-value <sup>#</sup> |
|----------------------------------------------------------------------------------------------|--------------------------|------------------------------|----------------------|
| <i>Have you ever had eczema/allergic dermatitis?</i>                                         |                          |                              |                      |
| Yes                                                                                          | 31%                      | 5%                           | <b>0.02</b>          |
| No                                                                                           | 69%                      | 95%                          |                      |
| <i>Have you ever had allergic rhinitis (hay fever)?</i>                                      |                          |                              |                      |
| Yes                                                                                          | 53%                      | 24%                          | <b>0.06</b>          |
| No                                                                                           | 48%                      | 76%                          |                      |
| <i>Do you have chronic or recurrent sinusitis (treated with antibiotics and/or surgery)?</i> |                          |                              |                      |
| Yes                                                                                          | 7%                       | 0%                           | NS                   |
| No                                                                                           | 93%                      | 100%                         |                      |
| <i>Have you ever had pneumonia?</i>                                                          |                          |                              |                      |
| Yes                                                                                          | 29%                      | 10%                          | 0.11                 |
| No                                                                                           | 71%                      | 91%                          |                      |
| <i>Have you been diagnosed with sleep disordered breathing (sleep apnea)?</i>                |                          |                              |                      |
| Yes                                                                                          | 5%                       | 0%                           | NS                   |
| No                                                                                           | 95%                      | 100%                         |                      |
| <i>Do you have gastroesophageal reflux disease (GERD)?</i>                                   |                          |                              |                      |
| Yes                                                                                          | 10%                      | 5%                           | NS                   |
| No                                                                                           | 91%                      | 95%                          |                      |

<sup>#</sup> Statistical significance was determined using Chi-square test, where NS = p≥0.2.

**Table S3:** Responses to Environmental exposure questionnaire for atopic participants.

| <b>Environmental exposure questions</b>                                                            | <b>Atopic Asthmatics<br/>(n = 42)</b> | <b>Atopic Non-asthmatics<br/>(n = 21)</b> | <b>p-value<sup>#</sup></b> |
|----------------------------------------------------------------------------------------------------|---------------------------------------|-------------------------------------------|----------------------------|
| <i>Do you live within a mile of a farm?</i>                                                        |                                       |                                           |                            |
| Yes                                                                                                | <b>17%</b>                            | <b>10%</b>                                | NS                         |
| No                                                                                                 | <b>83%</b>                            | <b>91%</b>                                |                            |
| <i>Do you live within a mile of a major highway?</i>                                               |                                       |                                           |                            |
| Yes                                                                                                | <b>67%</b>                            | <b>48%</b>                                | 0.18                       |
| No                                                                                                 | <b>33%</b>                            | <b>52%</b>                                |                            |
| <i>Does the home you live in have a yard?</i>                                                      |                                       |                                           |                            |
| Yes                                                                                                | <b>69%</b>                            | <b>57%</b>                                | NS                         |
| No                                                                                                 | <b>31%</b>                            | <b>43%</b>                                |                            |
| <i>Have you been around animals outside your home at least 2 days/week in the past 3 months?</i>   |                                       |                                           |                            |
| Yes                                                                                                | <b>36%</b>                            | <b>29%</b>                                | NS                         |
| No                                                                                                 | <b>64%</b>                            | <b>71%</b>                                |                            |
| <i>Are you frequently exposed (2 or more days/week) to tobacco smoke outside of your home?</i>     |                                       |                                           |                            |
| Yes                                                                                                | <b>17%</b>                            | <b>10%</b>                                | NS                         |
| No                                                                                                 | <b>83%</b>                            | <b>91%</b>                                |                            |
| <i>Has there been any mold or mildew, on any surfaces inside your house in the past 12 months?</i> |                                       |                                           |                            |
| Yes                                                                                                | <b>35%</b>                            | <b>35%</b>                                | NS                         |
| No                                                                                                 | <b>65%</b>                            | <b>65%</b>                                |                            |
| <i>Does your household have any pets?</i>                                                          |                                       |                                           |                            |
| Yes                                                                                                | <b>33%</b>                            | <b>43%</b>                                | NS                         |
| No                                                                                                 | <b>67%</b>                            | <b>57%</b>                                |                            |
| <i>In general, and on a regular basis, are you exposed to cats?</i>                                |                                       |                                           |                            |
| Yes                                                                                                | <b>29%</b>                            | <b>43%</b>                                | NS                         |
| No                                                                                                 | <b>71%</b>                            | <b>57%</b>                                |                            |
| <i>In general, and on a regular basis, are you exposed to dogs?</i>                                |                                       |                                           |                            |
| Yes                                                                                                | <b>50%</b>                            | <b>43%</b>                                | NS                         |
| No                                                                                                 | <b>50%</b>                            | <b>57%</b>                                |                            |
| <i>In general, and on a regular basis, are you exposed to other furry pets?</i>                    |                                       |                                           |                            |
| Yes                                                                                                | <b>7%</b>                             | <b>5%</b>                                 | NS                         |
| No                                                                                                 | <b>93%</b>                            | <b>95%</b>                                |                            |
| <i>In general, and on a regular basis, are you exposed to birds?</i>                               |                                       |                                           |                            |
| Yes                                                                                                | <b>7%</b>                             | <b>5%</b>                                 | NS                         |
| No                                                                                                 | <b>93%</b>                            | <b>95%</b>                                |                            |
| <i>In general, and on a regular basis, are you exposed to farm animals?</i>                        |                                       |                                           |                            |
| Yes                                                                                                | <b>5%</b>                             | <b>0%</b>                                 | NS                         |
| No                                                                                                 | <b>95%</b>                            | <b>100%</b>                               |                            |
| <i>Do you ever see cockroaches in your house?</i>                                                  |                                       |                                           |                            |
| Yes                                                                                                | <b>14%</b>                            | <b>19%</b>                                | NS                         |
| No                                                                                                 | <b>86%</b>                            | <b>81%</b>                                |                            |
| <i>Do you ever see rodents or rodent droppings in your house?</i>                                  |                                       |                                           |                            |
| Yes                                                                                                | <b>14%</b>                            | <b>19%</b>                                | NS                         |
| No                                                                                                 | <b>86%</b>                            | <b>81%</b>                                |                            |
| <i>Do you ever see cockroaches OR rodents/rodent droppings in your house?</i>                      |                                       |                                           |                            |
| Yes                                                                                                | <b>29%</b>                            | <b>33%</b>                                | NS                         |
| No                                                                                                 | <b>71%</b>                            | <b>67%</b>                                |                            |

<sup>#</sup> Statistical significance was determined using Chi-square test, where NS = p≥0.2.

**Table S4:** Specific bacterial taxa that differ in relative abundance between atopic asthmatic (AA) and healthy control (HC) subjects.

| OTU ID  | AA#   | HC#  | AA-HC        | q-value   | Phylum         | Class                 | Order              | Family                | Genus                | Species           |
|---------|-------|------|--------------|-----------|----------------|-----------------------|--------------------|-----------------------|----------------------|-------------------|
| 2714267 | 356.8 | 61.5 | <b>295.3</b> | 0.0610    | Bacteroidetes  | Bacteroidia           | Bacteroidales      | Paraprevotellaceae    | <i>Prevotella</i>    | <i>tannerae</i>   |
| 4406393 | 243.8 | 1.0  | <b>242.8</b> | 0.0041    | Proteobacteria | Gammaproteobacteria   | Pasteuriales       | Pasteurellaceae       | <i>Haemophilus</i>   | -                 |
| 2438396 | 192.5 | 1.7  | <b>190.8</b> | 3.00E-106 | Fusobacteria   | Fusobacteriia         | Fusobacteriales    | Fusobacteriaceae      | <i>Fusobacterium</i> | -                 |
| 4440404 | 176.8 | 0.2  | <b>176.7</b> | 1.66E-21  | Proteobacteria | Betaproteobacteria    | Neisseriales       | Neisseriaceae         | <i>Neisseria</i>     | -                 |
| 4405869 | 196.0 | 47.4 | <b>148.6</b> | 0.0347    | Fusobacteria   | Fusobacteriia         | Fusobacteriales    | Fusobacteriaceae      | <i>Fusobacterium</i> | -                 |
| 4296424 | 137.9 | 37.8 | <b>100.2</b> | 0.0759    | Actinobacteria | Actinobacteria        | Actinomycetales    | Actinomycetaceae      | <i>Actinomyces</i>   | -                 |
| 240049  | 48.2  | 0.8  | <b>47.3</b>  | 0.0011    | Bacteroidetes  | Bacteroidia           | Bacteroidales      | Prevotellaceae        | <i>Prevotella</i>    | -                 |
| 1541939 | 47.9  | 2.0  | <b>45.9</b>  | 0.0011    | Bacteroidetes  | Bacteroidia           | Bacteroidales      | Prevotellaceae        | <i>Prevotella</i>    | -                 |
| 71146   | 43.4  | 1.4  | <b>42.0</b>  | 0.0231    | Spirochaetes   | Spirochaetes          | Spirochaetales     | Spirochaetaceae       | <i>Treponema</i>     | -                 |
| 4448211 | 32.6  | 6.5  | <b>26.1</b>  | 0.0476    | Actinobacteria | Actinobacteria        | Actinomycetales    | Actinomycetaceae      | <i>Actinomyces</i>   | -                 |
| 4388775 | 31.8  | 6.8  | <b>24.9</b>  | 0.0297    | Firmicutes     | Clostridia            | Clostridiales      | Veillonellaceae       | <i>Veillonella</i>   | <i>dispar</i>     |
| 4468500 | 24.4  | 2.5  | <b>21.9</b>  | 1.02E-34  | Firmicutes     | Clostridia            | Clostridiales      | Mogibacteriaceae      | <i>Anerovorax</i>    | -                 |
| 642465  | 21.4  | 0.3  | <b>21.1</b>  | 0.0041    | Bacteroidetes  | Bacteroidia           | Bacteroidales      | Prevotellaceae        | <i>Prevotella</i>    | -                 |
| 70671   | 87.4  | 67.5 | <b>19.9</b>  | 2.66E-09  | Bacteroidetes  | Bacteroidia           | Bacteroidales      | Prevotellaceae        | <i>Prevotella</i>    | -                 |
| 73875   | 25.5  | 7.4  | <b>18.1</b>  | 4.02E-28  | Spirochaetes   | Spirochaetes          | Spirochaetales     | Spirochaetaceae       | <i>Treponema</i>     | -                 |
| 41911   | 17.7  | 0.2  | <b>17.4</b>  | 0.0027    | Bacteroidetes  | Bacteroidia           | Bacteroidales      | Prevotellaceae        | <i>Prevotella</i>    | -                 |
| 4297695 | 16.1  | 2.5  | <b>13.6</b>  | 0.0667    | Proteobacteria | Epsilonproteobacteria | Campylobacteriales | Campylobacteraceae    | <i>Campylobacter</i> | -                 |
| 495451  | 11.3  | 0.4  | <b>10.9</b>  | 4.53E-12  | Bacteroidetes  | Bacteroidia           | Bacteroidales      | Porphyromonadaceae    | <i>Porphyromonas</i> | -                 |
| 250288  | 14.1  | 5.4  | <b>8.8</b>   | 5.95E-12  | Firmicutes     | Clostridia            | Clostridiales      | Peptostreptococcaceae | -                    | -                 |
| 1033013 | 9.8   | 1.1  | <b>8.7</b>   | 6.48E-14  | Fusobacteria   | Fusobacteriia         | Fusobacteriales    | Leptotrichiaceae      | <i>Leptotrichia</i>  | -                 |
| 4307228 | 9.1   | 0.8  | <b>8.3</b>   | 0.0550    | Spirochaetes   | Spirochaetes          | Spirochaetales     | Spirochaetaceae       | <i>Treponema</i>     | -                 |
| 1398    | 8.2   | 0.4  | <b>7.8</b>   | 0.0277    | Bacteroidetes  | Bacteroidia           | Bacteroidales      | Paraprevotellaceae    | <i>Prevotella</i>    | -                 |
| 949816  | 9.2   | 1.7  | <b>7.5</b>   | 0.0622    | Firmicutes     | Bacilli               | Lactobacillales    | Streptococcaceae      | <i>Streptococcus</i> | -                 |
| 4480775 | 8.4   | 1.0  | <b>7.4</b>   | 0.0231    | Proteobacteria | Betaproteobacteria    | Neisseriales       | Neisseriaceae         | <i>Kingella</i>      | -                 |
| 4331815 | 7.5   | 0.5  | <b>7.0</b>   | 3.60E-10  | Proteobacteria | Alphaproteobacteria   | Sphingomonadales   | Sphingomonadaceae     | -                    | -                 |
| 3859    | 11.6  | 4.9  | <b>6.7</b>   | 1.42E-08  | Spirochaetes   | Spirochaetes          | Spirochaetales     | Spirochaetaceae       | <i>Treponema</i>     | <i>amylovorum</i> |
| 855912  | 6.6   | 1.2  | <b>5.5</b>   | 3.46E-09  | Fusobacteria   | Fusobacteriia         | Fusobacteriales    | Fusobacteriaceae      | <i>Fusobacterium</i> | -                 |

| OTU ID  | AA#  | HC#  | AA-HC       | q-value  | Phylum         | Class               | Order             | Family             | Genus                  | Species           |
|---------|------|------|-------------|----------|----------------|---------------------|-------------------|--------------------|------------------------|-------------------|
| 267852  | 5.9  | 0.6  | <b>5.3</b>  | 1.96E-08 | Proteobacteria | Alphaproteobacteria | Sphingomonadales  | Sphingomonadaceae  | <i>Sphingopyxis</i>    | <i>aluskensis</i> |
| 1033687 | 5.1  | 0.3  | <b>4.8</b>  | 0.0914   | Bacteroidetes  | Bacteroidia         | Bacteroidales     | Prevotellaceae     | <i>Prevotella</i>      | -                 |
| 292057  | 6.3  | 1.5  | <b>4.7</b>  | 1.07E-07 | Firmicutes     | Bacilli             | Lactobacillales   | Lactobacillaceae   | <i>Lactobacillus</i>   | -                 |
| 328     | 4.9  | 0.4  | <b>4.5</b>  | 0.0498   | Bacteroidetes  | Bacteroidia         | Bacteroidales     | Porphyromonadaceae | <i>Porphyromonas</i>   | -                 |
| 851668  | 4.5  | 0.1  | <b>4.4</b>  | 0.0017   | Bacteroidetes  | Bacteroidia         | Bacteroidales     | Prevotellaceae     | <i>Prevotella</i>      | -                 |
| 4093791 | 14.5 | 10.7 | <b>3.8</b>  | 0.0469   | Firmicutes     | Clostridia          | Clostridiales     | Mogibacteriaceae   | -                      | -                 |
| 4410166 | 3.1  | 0.1  | <b>3.0</b>  | 0.0073   | Bacteroidetes  | Bacteroidia         | Bacteroidales     | Prevotellaceae     | <i>Prevotella</i>      | <i>copri</i>      |
| 1304    | 3.0  | 0.1  | <b>2.9</b>  | 0.0082   | Proteobacteria | Betaproteobacteria  | Neisseriales      | Neisseriaceae      | <i>Neisseria</i>       | <i>subflava</i>   |
| 2377731 | 3.2  | 0.5  | <b>2.6</b>  | 0.0002   | Firmicutes     | Clostridia          | Clostridiales     | Veillonellaceae    | <i>Selenomonas</i>     | -                 |
| 832     | 3.1  | 0.8  | <b>2.3</b>  | 0.0010   | Fusobacteria   | Fusobacteriia       | Fusobacteriales   | Leptotrichiaceae   | <i>Leptotrichia</i>    | -                 |
| 130864  | 2.7  | 0.4  | <b>2.3</b>  | 0.0009   | Firmicutes     | Bacilli             | Lactobacillales   | Lactobacillaceae   | <i>Lactobacillus</i>   | <i>iners</i>      |
| 29566   | 2.3  | 0.1  | <b>2.2</b>  | 0.0200   | Fusobacteria   | Fusobacteriia       | Fusobacteriales   | Leptotrichiaceae   | <i>Sneathia</i>        | -                 |
| 1062051 | 2.6  | 0.8  | <b>1.8</b>  | 0.0083   | Actinobacteria | Actinobacteria      | Actinomycetales   | Corynebacteriaceae | <i>Corynebacterium</i> | -                 |
| 1116069 | 2.4  | 0.6  | <b>1.8</b>  | 0.0072   | Bacteroidetes  | Cytophagia          | Cytophagales      | Cytophagaceae      | -                      | -                 |
| 1135830 | 2.6  | 1.1  | <b>1.5</b>  | 0.0603   | Proteobacteria | Betaproteobacteria  | Burkholderiales   | Comamonadaceae     | -                      | -                 |
| 4375000 | 0.5  | 1.5  | <b>-0.9</b> | 0.0713   | Proteobacteria | Gammaproteobacteria | Enterobacteriales | Enterobacteriaceae | -                      | -                 |
| 165489  | 0.5  | 1.5  | <b>-1.0</b> | 0.0333   | Proteobacteria | Gammaproteobacteria | Enterobacteriales | Enterobacteriaceae | -                      | -                 |
| 160203  | 0.3  | 1.3  | <b>-1.0</b> | 0.0108   | Actinobacteria | Actinobacteria      | Actinomycetales   | Micrococcaceae     | <i>Kocuria</i>         | <i>palustris</i>  |
| 538185  | 0.5  | 1.8  | <b>-1.3</b> | 0.0165   | Firmicutes     | Bacilli             | Lactobacillales   | Streptococcaceae   | <i>Streptococcus</i>   | -                 |
| 4469627 | 0.9  | 2.2  | <b>-1.3</b> | 0.0204   | Proteobacteria | Gammaproteobacteria | Pasteuriales      | Pasteurellaceae    | <i>Haemophilus</i>     | -                 |
| 4335450 | 1.4  | 3.3  | <b>-1.9</b> | 0.0041   | Fusobacteria   | Fusobacteriia       | Fusobacteriales   | Leptotrichiaceae   | -                      | -                 |
| 51646   | 0.4  | 2.6  | <b>-2.2</b> | 2.96E-06 | Proteobacteria | Gammaproteobacteria | Enterobacteriales | Enterobacteriaceae | -                      | -                 |
| 3799784 | 0.9  | 3.2  | <b>-2.3</b> | 1.43E-05 | Proteobacteria | Gammaproteobacteria | Enterobacteriales | Enterobacteriaceae | -                      | -                 |
| 521996  | 0.3  | 2.8  | <b>-2.6</b> | 0.0252   | Firmicutes     | Bacilli             | Lactobacillales   | Streptococcaceae   | <i>Streptococcus</i>   | -                 |
| 710275  | 0.8  | 3.5  | <b>-2.6</b> | 8.49E-07 | Proteobacteria | Gammaproteobacteria | Pseudomonadales   | Moraxellaceae      | <i>Achetobacter</i>    | -                 |
| 849642  | 0.2  | 4.0  | <b>-3.8</b> | 1.67E-09 | Proteobacteria | Betaproteobacteria  | Burkholderiales   | Comamonadaceae     | -                      | -                 |
| 4417996 | 1.4  | 5.5  | <b>-4.1</b> | 2.22E-10 | Proteobacteria | Betaproteobacteria  | Burkholderiales   | Comamonadaceae     | -                      | -                 |
| 399903  | 2.4  | 6.7  | <b>-4.3</b> | 1.20E-08 | Spirochaetes   | Spirochaetes        | Spirochaetales    | Spirochaetaeae     | <i>Treponema</i>       | -                 |
| 242070  | 1.7  | 6.2  | <b>-4.4</b> | 1.53E-10 | Proteobacteria | Gammaproteobacteria | Pseudomonadales   | Pseudomonadaceae   | <i>Pseudomonas</i>     | -                 |

| OTU ID  | AA#   | HC#   | AA-HC  | q-value   | Phylum         | Class               | Order            | Family                | Genus                     | Species     |
|---------|-------|-------|--------|-----------|----------------|---------------------|------------------|-----------------------|---------------------------|-------------|
| 851961  | 1.9   | 7.3   | -5.5   | 1.38E-13  | Bacteroidetes  | Bacteroidia         | Bacteroidales    | Prevotellaceae        | <i>Prevotella</i>         | -           |
| 114510  | 2.8   | 11.6  | -8.9   | 6.38E-23  | Proteobacteria | Gammaproteobacteria | Enterobacterales | Enterobacteriaceae    | -                         | -           |
| 100791  | 2.7   | 12.2  | -9.6   | 1.98E-25  | Proteobacteria | Betaproteobacteria  | Burkholderiales  | Comamonadaceae        | -                         | -           |
| 4333897 | 3.6   | 15.9  | -12.3  | 3.51E-32  | Proteobacteria | Gammaproteobacteria | Enterobacterales | Enterobacteriaceae    | -                         | -           |
| 4477971 | 3.8   | 17.7  | -13.9  | 1.85E-37  | Firmicutes     | Clostridia          | Clostridiales    | -                     | -                         | -           |
| 74407   | 1.3   | 16.9  | -15.6  | 1.69E-44  | Bacteroidetes  | Bacteroidia         | Bacteroidales    | Prevotellaceae        | <i>Prevotella</i>         | -           |
| 4396717 | 2.5   | 25.6  | -23.1  | 8.72E-68  | Proteobacteria | Alphaproteobacteria | Rhizobiales      | Methylobacteriaceae   | <i>Methylobacterium</i>   | -           |
| 4469032 | 21.9  | 45.3  | -23.4  | 2.20E-34  | Firmicutes     | Bacilli             | Lactobacillales  | -                     | -                         | -           |
| 70628   | 0.4   | 24.3  | -24.0  | 2.55E-37  | Fusobacteria   | Fusobacteria        | Fusobacteriales  | Leptotrichiaceae      | <i>Leptotrichia</i>       | -           |
| 55854   | 0.2   | 24.9  | -24.7  | 0.0610    | Bacteroidetes  | Bacteroidia         | Bacteroidales    | Prevotellaceae        | <i>Prevotella</i>         | -           |
| 98258   | 0.7   | 26.7  | -26.0  | 0.0186    | Cyanobacteria  | 4C0d-2              | MLE1-12          | -                     | -                         | -           |
| 269930  | 22.8  | 81.1  | -58.3  | 8.82E-139 | Proteobacteria | Gammaproteobacteria | Pseudomonadales  | Pseudomonadaceae      | -                         | -           |
| 684     | 1.6   | 61.8  | -60.3  | 0.0001    | Firmicutes     | Bacilli             | Lactobacillales  | -                     | -                         | -           |
| 114813  | 1.0   | 66.9  | -66.0  | 6.31E-102 | Bacteroidetes  | Bacteroidia         | Bacteroidales    | Prevotellaceae        | <i>Prevotella</i>         | -           |
| 4404577 | 372.8 | 441.8 | -69.0  | 4.03E-23  | Firmicutes     | Clostridia          | Clostridiales    | Peptostreptococcaceae | <i>Peptostreptococcus</i> | -           |
| 4480189 | 10.0  | 98.2  | -88.2  | 1.23E-259 | Firmicutes     | Bacilli             | Lactobacillales  | Lactobacillaceae      | <i>Lactobacillus</i>      | <i>zeae</i> |
| 4335578 | 221.3 | 332.8 | -111.6 | 6.19E-92  | Firmicutes     | Clostridia          | Clostridiales    | Mogibacteriaceae      | -                         | -           |
| 4404220 | 336.1 | 452.3 | -116.2 | 5.61E-69  | Proteobacteria | Gammaproteobacteria | Pasteuriales     | Pasteurellaceae       | <i>Actinobacillus</i>     | -           |
| 4400260 | 2.3   | 123.2 | -120.9 | 0.0333    | Fusobacteria   | Fusobacteria        | Fusobacteriales  | Leptotrichiaceae      | <i>Leptotrichia</i>       | -           |
| 4307006 | 11.1  | 246.5 | -235.4 | 0         | Bacteroidetes  | Bacteroidia         | Bacteroidales    | Prevotellaceae        | <i>Prevotella</i>         | -           |

# mean relative abundance

**Table S5:** Specific bacterial taxa that differ in relative abundance between atopic non-asthmatic (ANA) and healthy control (HC) subjects.

| OTU ID  | ANA <sup>#</sup> | HC <sup>#</sup> | ANA-HC       | q-value   | Phylum         | Class                 | Order              | Family                | Genus                  | Species               |
|---------|------------------|-----------------|--------------|-----------|----------------|-----------------------|--------------------|-----------------------|------------------------|-----------------------|
| 4432431 | 963.7            | 55.5            | <b>908.3</b> | 0.0029    | Proteobacteria | Gammaproteobacteria   | Pasteurales        | Pasteurellaceae       | <i>Aggregatibacter</i> | <i>segnis</i>         |
| 828676  | 315.3            | 0.1             | <b>315.3</b> | 0.0036    | Fusobacteria   | Fusobacteriia         | Fusobacteriales    | Fusobacteriaceae      | <i>Fusobacterium</i>   | -                     |
| 978067  | 292.5            | 12.1            | <b>280.4</b> | 0.0302    | Proteobacteria | Betaproteobacteria    | Neisseriales       | Neisseriaceae         | -                      | -                     |
| 4483015 | 218.4            | 18.0            | <b>200.4</b> | 0.0143    | Firmicutes     | Bacilli               | Lactobacillales    | Carnobacteriaceae     | <i>Granulicatella</i>  | -                     |
| 4306587 | 158.2            | 11.7            | <b>146.5</b> | 0.0758    | Firmicutes     | Clostridia            | Clostridiales      | Veillonellaceae       | <i>Selenomonas</i>     | -                     |
| 134265  | 119.2            | 7.2             | <b>112.0</b> | 2.37E-152 | Bacteroidetes  | Bacteroidia           | Bacteroidales      | Prevotellaceae        | <i>Prevotella</i>      | -                     |
| 4296424 | 141.9            | 37.8            | <b>104.1</b> | 0.0613    | Actinobacteria | Actinobacteria        | Actinomycetales    | Actinomycetaceae      | <i>Actinomyces</i>     | -                     |
| 495067  | 103.4            | 3.6             | <b>99.8</b>  | 1.74E-111 | Actinobacteria | Actinobacteria        | Actinomycetales    | Corynebacteriaceae    | <i>Corynebacterium</i> | -                     |
| 4372058 | 105.2            | 5.6             | <b>99.6</b>  | 0.0007    | Bacteroidetes  | Bacteroidia           | Bacteroidales      | Prevotellaceae        | <i>Prevotella</i>      | <i>melaninigenica</i> |
| 4459993 | 102.7            | 4.5             | <b>98.2</b>  | 0.0854    | Bacteroidetes  | Bacteroidia           | Bacteroidales      | Porphyromonadaceae    | <i>Porphyromonas</i>   | -                     |
| 976838  | 98.5             | 29.9            | <b>68.5</b>  | 5.39E-95  | Proteobacteria | Epsilonproteobacteria | Gammylobacterales  | Helicobacteraceae     | <i>Flexispira</i>      | -                     |
| 2466322 | 65.7             | 0.2             | <b>65.6</b>  | 0.0092    | Firmicutes     | Clostridia            | Clostridiales      | Peptostreptococcaceae | -                      | -                     |
| 4388775 | 70.5             | 6.8             | <b>63.7</b>  | 0.0047    | Firmicutes     | Clostridia            | Clostridiales      | Veillonellaceae       | <i>Veillonella</i>     | <i>dispar</i>         |
| 1015518 | 55.8             | 1.8             | <b>54.0</b>  | 4.86E-58  | Actinobacteria | Actinobacteria        | Actinomycetales    | Corynebacteriaceae    | <i>Corynebacterium</i> | -                     |
| 4469627 | 55.3             | 2.2             | <b>53.0</b>  | 8.15E-63  | Proteobacteria | Gammaproteobacteria   | Pasteurales        | Pasteurellaceae       | <i>Haemophilus</i>     | -                     |
| 4297222 | 47.9             | 4.3             | <b>43.6</b>  | 1.36E-65  | Firmicutes     | Bacilli               | Lactobacillales    | Streptococcaceae      | <i>Streptococcus</i>   | -                     |
| 995     | 44.7             | 2.5             | <b>42.2</b>  | 0.0242    | Bacteroidetes  | Bacteroidia           | Bacteroidales      | Prevotellaceae        | <i>Prevotella</i>      | <i>melaninigenica</i> |
| 1053321 | 75.5             | 36.6            | <b>38.9</b>  | 3.63E-38  | Proteobacteria | Gammaproteobacteria   | Pseudomonadales    | Moraxellaceae         | <i>Moraxella</i>       | -                     |
| 4364176 | 47.9             | 11.3            | <b>36.6</b>  | 1.91E-55  | Firmicutes     | Erysipelotrichi       | Erysipelotrichales | Erysipelotrichaceae   | <i>Sharpea</i>         | -                     |
| 267852  | 33.8             | 0.6             | <b>33.2</b>  | 1.47E-27  | Proteobacteria | Alphaproteobacteria   | Sphingomonadales   | Sphingomonadaceae     | <i>Sphingopyxis</i>    | <i>alaskensis</i>     |
| 4419634 | 33.3             | 2.3             | <b>31.0</b>  | 0.0302    | Fusobacteria   | Fusobacteriia         | Fusobacteriales    | Leptotrichiaceae      | <i>Leptotrichia</i>    | -                     |
| 1102    | 33.7             | 3.8             | <b>29.9</b>  | 0.0583    | Bacteroidetes  | Bacteroidia           | Bacteroidales      | Prevotellaceae        | <i>Prevotella</i>      | <i>nancelensis</i>    |
| 575     | 28.0             | 0.5             | <b>27.5</b>  | 0.0014    | Bacteroidetes  | Bacteroidia           | Bacteroidales      | Prevotellaceae        | <i>Prevotella</i>      | <i>melaninigenica</i> |
| 2438396 | 28.2             | 1.7             | <b>26.5</b>  | 4.60E-36  | Fusobacteria   | Fusobacteriia         | Fusobacteriales    | Fusobacteriaceae      | <i>Fusobacterium</i>   | -                     |
| 1044611 | 24.1             | 0.8             | <b>23.3</b>  | 0.0434    | Firmicutes     | Clostridia            | Clostridiales      | Peptostreptococcaceae | -                      | -                     |
| 4353757 | 24.0             | 1.3             | <b>22.7</b>  | 0.0043    | Proteobacteria | Gammaproteobacteria   | Pasteurales        | Pasteurellaceae       | <i>Aggregatibacter</i> | -                     |



| OTU ID  | ANA# | HC#  | ANA-<br>HC | q-value  | Phylum         | Class                | Order              | Family                  | Genus                | Species            |
|---------|------|------|------------|----------|----------------|----------------------|--------------------|-------------------------|----------------------|--------------------|
| 787709  | 24.9 | 3.7  | 21.2       | 0.0192   | Actinobacteria | Actinobacteria       | Actinomycetales    | Actinomycetaceae        | <i>Actinomyces</i>   | -                  |
| 4412630 | 22.1 | 1.3  | 20.8       | 0.0132   | Bacteroidetes  | Bacteroidia          | Bacteroidales      | Porphyromonadaceae      | <i>Porphyromonas</i> | -                  |
| 876114  | 24.1 | 3.8  | 20.3       | 2.50E-32 | Fusobacteria   | Fusobacteria         | Fusobacteriales    | Leptotrichiaceae        | -                    | -                  |
| 71146   | 18.1 | 1.4  | 16.7       | 0.0714   | Spirochaetes   | Spirochaetes         | Spirochaetales     | Spirochaetaceae         | <i>Treponema</i>     | -                  |
| 4333897 | 32.1 | 15.9 | 16.2       | 1.12E-45 | Proteobacteria | Gammmaproteobacteria | Enterobacteriales  | Enterobacteriaceae      | -                    | -                  |
| 3859    | 20.6 | 4.9  | 15.7       | 9.42E-24 | Spirochaetes   | Spirochaetes         | Spirochaetales     | Spirochaetaceae         | <i>Treponema</i>     | <i>amylovorum</i>  |
| 63117   | 14.7 | 1.9  | 12.8       | 2.17E-20 | Proteobacteria | Betaproteobacteria   | Neisseriales       | Neisseriaceae           | <i>Kingella</i>      | -                  |
| 4373910 | 18.9 | 7.0  | 11.9       | 4.85E-15 | Proteobacteria | Betaproteobacteria   | Neisseriales       | Neisseriaceae           | <i>Neisseria</i>     | -                  |
| 89      | 11.4 | 0.1  | 11.3       | 1.40E-05 | Bacteroidetes  | Bacteroidia          | Bacteroidales      | Prevotellaceae          | <i>Prevotella</i>    | -                  |
| 1124080 | 11.5 | 1.0  | 10.5       | 7.55E-16 | Bacteroidetes  | Bacteroidia          | Bacteroidales      | -                       | -                    | -                  |
| 161677  | 10.4 | 0.3  | 10.1       | 1.07E-10 | Proteobacteria | Gammmaproteobacteria | Pseudomonadales    | Moraxellaceae           | <i>Acinetobacter</i> | -                  |
| 4468500 | 12.4 | 2.5  | 9.9        | 1.12E-15 | Firmicutes     | Clostridia           | Clostridiales      | Mogibacteriaceae        | <i>Anaerovorax</i>   | -                  |
| 124932  | 10.9 | 1.5  | 9.4        | 4.42E-15 | Spirochaetes   | Spirochaetes         | Spirochaetales     | Spirochaetaceae         | <i>Treponema</i>     | -                  |
| 3931    | 10.7 | 2.1  | 8.6        | 1.20E-13 | Spirochaetes   | Spirochaetes         | Spirochaetales     | Spirochaetaceae         | <i>Treponema</i>     | -                  |
| 956702  | 9.1  | 1.2  | 7.9        | 1.11E-12 | Proteobacteria | Gammmaproteobacteria | Pasteurellales     | Pasteurellaceae         | <i>Haemophilus</i>   | <i>influenzae</i>  |
| 4460505 | 10.2 | 3.3  | 6.9        | 1.93E-09 | Synergistetes  | Synergista           | Synergistales      | Dethiosulfovibrionaceae | <i>TGS</i>           | -                  |
| 41911   | 6.6  | 0.2  | 6.4        | 0.0562   | Bacteroidetes  | Bacteroidia          | Bacteroidales      | Prevotellaceae          | <i>Prevotella</i>    | -                  |
| 114510  | 17.7 | 11.6 | 6.1        | 0.0007   | Proteobacteria | Gammmaproteobacteria | Enterobacteriales  | Enterobacteriaceae      | -                    | -                  |
| 4309323 | 6.8  | 1.0  | 5.8        | 0.0164   | Proteobacteria | Gammmaproteobacteria | Pasteurellales     | Pasteurellaceae         | <i>Haemophilus</i>   | -                  |
| 520222  | 5.5  | 0.1  | 5.5        | 0.0005   | Proteobacteria | Betaproteobacteria   | Burkholderiales    | Oxalobacteraceae        | -                    | -                  |
| 4313608 | 11.3 | 6.0  | 5.3        | 7.30E-05 | Bacteroidetes  | Bacteroidia          | Bacteroidales      | -                       | -                    | -                  |
| 4351304 | 5.9  | 0.5  | 5.3        | 3.12E-08 | Actinobacteria | Actinobacteria       | Actinomycetales    | Actinomycetaceae        | <i>Actinomyces</i>   | -                  |
| 1052181 | 6.8  | 1.9  | 4.9        | 3.64E-07 | Bacteroidetes  | Bacteroidia          | Bacteroidales      | Prevotellaceae          | <i>Prevotella</i>    | <i>nancelensis</i> |
| 4374322 | 5.8  | 0.9  | 4.9        | 6.14E-08 | Proteobacteria | Gammmaproteobacteria | Pseudomonadales    | Moraxellaceae           | <i>Acinetobacter</i> | -                  |
| 4419380 | 5.6  | 1.1  | 4.5        | 2.81E-07 | Firmicutes     | Erysipelotrichi      | Erysipelotrichales | Erysipelotrichaceae     | <i>Bullidia</i>      | <i>p-1630-c5</i>   |
| 4331815 | 4.8  | 0.5  | 4.3        | 7.69E-07 | Proteobacteria | Alphaproteobacteria  | Sphingomonadales   | Sphingomonadaceae       | -                    | -                  |
| 517     | 4.3  | 0.2  | 4.1        | 0.0462   | Bacteroidetes  | Bacteroidia          | Bacteroidales      | Porphyromonadaceae      | <i>Porphyromonas</i> | -                  |
| 544313  | 4.3  | 0.3  | 4.0        | 7.71E-06 | Proteobacteria | Gammmaproteobacteria | Pseudomonadales    | Pseudomonadaceae        | <i>Pseudomonas</i>   | -                  |
| 328     | 4.0  | 0.4  | 3.6        | 0.0478   | Bacteroidetes  | Bacteroidia          | Bacteroidales      | Porphyromonadaceae      | <i>Porphyromonas</i> | -                  |

| OTU ID  | ANA# | HC#  | ANA-<br>HC | q-value  | Phylum         | Class                 | Order              | Family              | Genus                   | Species |
|---------|------|------|------------|----------|----------------|-----------------------|--------------------|---------------------|-------------------------|---------|
| 3799784 | 6.5  | 3.2  | 3.2        | 0.0031   | Proteobacteria | Gammaproteobacteria   | Enterobacteriales  | Enterobacteriaceae  | -                       | -       |
| 325027  | 5.1  | 2.0  | 3.1        | 0.0007   | Proteobacteria | Betaproteobacteria    | Burkholderiales    | Comamonadaceae      | <i>Comamonas</i>        | -       |
| 43339   | 7.0  | 4.4  | 2.6        | 0.0562   | Firmicutes     | Clostridia            | Clostridiales      | Mogibacteriaceae    | -                       | -       |
| 2119418 | 2.7  | 0.1  | 2.6        | 0.0075   | Proteobacteria | Gammaproteobacteria   | Enterobacteriales  | Enterobacteriaceae  | -                       | -       |
| 3600504 | 2.5  | 0.5  | 2.0        | 0.0031   | Bacteroidetes  | Bacteroidia           | Bacteroidales      | Bacteroidaceae      | <i>Bacteroides</i>      | -       |
| 165489  | 3.4  | 1.5  | 1.9        | 0.0241   | Proteobacteria | Gammaproteobacteria   | Enterobacteriales  | Enterobacteriaceae  | -                       | -       |
| 4454619 | 2.3  | 0.8  | 1.5        | 0.0353   | Firmicutes     | Clostridia            | Clostridiales      | Veillonellaceae     | <i>Selenomonas</i>      | -       |
| 4412991 | 2.0  | 0.5  | 1.5        | 0.0247   | Proteobacteria | Betaproteobacteria    | Neisseriales       | Neisseriaceae       | -                       | -       |
| 4432889 | 2.1  | 0.6  | 1.5        | 0.0302   | Actinobacteria | Actinobacteria        | Actinomycetales    | Intrasporangiaceae  | -                       | -       |
| 495451  | 1.5  | 0.4  | 1.2        | 0.0613   | Bacteroidetes  | Bacteroidia           | Bacteroidales      | Porphyromonadaceae  | <i>Porphyromonas</i>    | -       |
| 51646   | 1.2  | 2.6  | -1.4       | 0.0854   | Proteobacteria | Gammaproteobacteria   | Enterobacteriales  | Enterobacteriaceae  | -                       | -       |
| 1010329 | 0.9  | 2.6  | -1.7       | 0.0173   | Bacteroidetes  | Flavobacteria         | Flavobacteriales   | Flavobacteriaceae   | <i>Campylophaga</i>     | -       |
| 4426165 | 0.9  | 2.8  | -1.9       | 0.0055   | Bacteroidetes  | Bacteroidia           | Bacteroidales      | Prevotellaceae      | <i>Prevotella</i>       | -       |
| 1595    | 1.4  | 3.6  | -2.2       | 0.0051   | Bacteroidetes  | Bacteroidia           | Bacteroidales      | Porphyromonadaceae  | <i>Porphyromonas</i>    | -       |
| 941024  | 1.0  | 3.4  | -2.4       | 8.94E-04 | Fusobacteria   | Fusobacteriia         | Fusobacteriales    | Fusobacteriaceae    | <i>Fusobacterium</i>    | -       |
| 4306356 | 0.2  | 3.0  | -2.8       | 0.0001   | Actinobacteria | Actinobacteria        | Actinomycetales    | Actinomycetaceae    | <i>Actinomyces</i>      | -       |
| 4401957 | 1.9  | 6.2  | -4.2       | 0.0920   | Proteobacteria | Epsilonproteobacteria | Campylobacteriales | Campylobacteraceae  | <i>Campylobacter</i>    | -       |
| 851961  | 0.3  | 7.3  | -7.0       | 4.95E-10 | Bacteroidetes  | Bacteroidia           | Bacteroidales      | Prevotellaceae      | <i>Prevotella</i>       | -       |
| 245523  | 9.7  | 17.8 | -8.0       | 3.05E-07 | Bacteroidetes  | Bacteroidia           | Bacteroidales      | -                   | -                       | -       |
| 923032  | 0.1  | 8.2  | -8.1       | 0.0908   | Fusobacteria   | Fusobacteriia         | Fusobacteriales    | Leptotrichiaceae    | <i>Leptotrichia</i>     | -       |
| 4477971 | 6.3  | 17.7 | -11.4      | 1.35E-15 | Firmicutes     | Clostridia            | Clostridiales      | -                   | -                       | -       |
| 100791  | 0.1  | 12.2 | -12.1      | 5.90E-09 | Proteobacteria | Betaproteobacteria    | Burkholderiales    | Comamonadaceae      | -                       | -       |
| 4443201 | 12.3 | 29.4 | -17.1      | 9.85E-21 | Bacteroidetes  | Bacteroidia           | Bacteroidales      | Porphyromonadaceae  | <i>Tannerella</i>       | -       |
| 4396717 | 8.2  | 25.6 | -17.4      | 1.91E-25 | Proteobacteria | Alphaproteobacteria   | Rhizobiales        | Methylobacteriaceae | <i>Methylobacterium</i> | -       |
| 579608  | 0.1  | 18.7 | -18.6      | 1.03E-10 | Firmicutes     | Bacilli               | Lactobacillales    | Streptococcaceae    | <i>Streptococcus</i>    | -       |
| 615020  | 15.9 | 36.7 | -20.8      | 3.31E-24 | Tenericutes    | Mollicutes            | Mycoplasmatales    | Mycoplasmataceae    | <i>Mycoplasma</i>       | -       |
| 4344371 | 35.3 | 57.7 | -22.4      | 1.86E-16 | Proteobacteria | Alphaproteobacteria   | Sphingomonadales   | Sphingomonadaceae   | <i>Sphingomonas</i>     | -       |
| 70628   | 0.2  | 24.3 | -24.1      | 4.42E-15 | Fusobacteria   | Fusobacteriia         | Fusobacteriales    | Leptotrichiaceae    | <i>Leptotrichia</i>     | -       |
| 4297119 | 3.7  | 39.8 | -36.2      | 0.0968   | Fusobacteria   | Fusobacteriia         | Fusobacteriales    | Leptotrichiaceae    | <i>Leptotrichia</i>     | -       |

| OTU ID  | ANA#  | HC#   | ANA-<br>HC    | q-value   | Phylum         | Class                 | Order             | Family             | Genus                | Species     |
|---------|-------|-------|---------------|-----------|----------------|-----------------------|-------------------|--------------------|----------------------|-------------|
| 123320  | 0.1   | 36.8  | <b>-36.8</b>  | 7.58E-09  | Firmicutes     | Bacilli               | Lactobacillales   | Streptococcaceae   | <i>Streptococcus</i> | -           |
| 4480189 | 60.8  | 98.2  | <b>-37.4</b>  | 1.28E-26  | Firmicutes     | Bacilli               | Lactobacillales   | Lactobacillaceae   | <i>Lactobacillus</i> | <i>zege</i> |
| 1048420 | 7.0   | 46.4  | <b>-39.4</b>  | 0.0149    | Firmicutes     | Bacilli               | Lactobacillales   | Streptococcaceae   | <i>Streptococcus</i> | -           |
| 28118   | 0.1   | 52.9  | <b>-52.8</b>  | 0.0029    | Firmicutes     | Clostridia            | Clostridiales     | Vellionellaceae    | <i>Selenomonas</i>   | -           |
| 684     | 1.9   | 61.8  | <b>-59.9</b>  | 0.0103    | Firmicutes     | Bacilli               | Lactobacillales   | -                  | -                    | -           |
| 4376637 | 8.1   | 73.5  | <b>-65.4</b>  | 0.0785    | Spirochaetes   | Spirochaetes          | Spirochaetales    | Spirochaetaceae    | <i>Treponema</i>     | -           |
| 269930  | 0.1   | 81.1  | <b>-80.9</b>  | 0.0065    | Proteobacteria | Gammaproteobacteria   | Pseudomonadales   | Pseudomonadaceae   | -                    | -           |
| 557974  | 10.1  | 96.8  | <b>-86.8</b>  | 0.0812    | Proteobacteria | Gammaproteobacteria   | Pseudomonadales   | Pseudomonadaceae   | <i>Pseudomonas</i>   | -           |
| 69782   | 1.7   | 122.8 | <b>-121.0</b> | 6.05E-101 | Proteobacteria | Epsilonproteobacteria | Campylobacterales | Helicobacteraceae  | <i>Helicobacter</i>  | -           |
| 3581175 | 3.0   | 133.8 | <b>-130.8</b> | 1.90E-137 | Firmicutes     | Clostridia            | Clostridiales     | Vellionellaceae    | -                    | -           |
| 1004910 | 93.5  | 260.4 | <b>-166.9</b> | 7.86E-226 | Bacteroidetes  | Bacteroidia           | Bacteroidales     | Prevotellaceae     | <i>Prevotella</i>    | -           |
| 4331006 | 30.5  | 205.6 | <b>-175.1</b> | 0         | Bacteroidetes  | Bacteroidia           | Bacteroidales     | Prevotellaceae     | <i>Prevotella</i>    | -           |
| 4377418 | 215.8 | 413.2 | <b>-197.4</b> | 4.13E-185 | Firmicutes     | Clostridia            | Clostridiales     | Tisslerellaceae    | <i>Parvimonas</i>    | -           |
| 4307006 | 3.5   | 246.5 | <b>-242.9</b> | 5.60E-204 | Bacteroidetes  | Bacteroidia           | Bacteroidales     | Prevotellaceae     | <i>Prevotella</i>    | -           |
| 2613485 | 4.7   | 428.8 | <b>-424.2</b> | 0         | Bacteroidetes  | Bacteroidia           | Bacteroidales     | Porphyromonadaceae | <i>Porphyromonas</i> | -           |
| 252843  | 8.1   | 450.7 | <b>-442.6</b> | 0         | Fusobacteria   | Fusobacteria          | Fusobacteriales   | Leptotrichiaceae   | <i>Leptotrichia</i>  | -           |

# mean relative abundance

**Table S6:** Specific bacterial taxa which differ in relative abundance between atopic asthmatic (AA) and atopic non-asthmatic (ANA) subjects.

| OTU ID  | AA#   | ANA#  | AA-ANA       | q-value  | Phylum         | Class                 | Order              | Family             | Genus                | Species               |
|---------|-------|-------|--------------|----------|----------------|-----------------------|--------------------|--------------------|----------------------|-----------------------|
| 252843  | 503.7 | 8.1   | <b>495.6</b> | 0.0255   | Fusobacteria   | Fusobacteria          | Fusobacteriales    | Leptotrichiaceae   | <i>Leptotrichia</i>  | -                     |
| 4307790 | 518.8 | 119.1 | <b>399.7</b> | 0.0255   | Firmicutes     | Clostridia            | Clostridiales      | Veillonellaceae    | <i>Selenomonas</i>   | -                     |
| 4338372 | 363.6 | 86.0  | <b>277.6</b> | 0.0132   | Bacteroidetes  | Bacteroidia           | Bacteroidales      | Prevotellaceae     | <i>Prevotella</i>    | -                     |
| 4406393 | 243.8 | 1.8   | <b>242.0</b> | 0.0014   | Proteobacteria | Gammaproteobacteria   | Pasteuriales       | Pasteurellaceae    | <i>Haemophilus</i>   | -                     |
| 2438396 | 192.5 | 28.2  | <b>164.3</b> | 0        | Fusobacteria   | Fusobacteria          | Fusobacteriales    | Fusobacteriaceae   | <i>Fusobacterium</i> | -                     |
| 4405869 | 196.0 | 57.4  | <b>138.6</b> | 0.0711   | Fusobacteria   | Fusobacteria          | Fusobacteriales    | Fusobacteriaceae   | <i>Fusobacterium</i> | -                     |
| 4393181 | 141.3 | 3.4   | <b>137.9</b> | 0.0004   | Tenericutes    | Mollicutes            | Mycoplasmatales    | Mycoplasmataceae   | <i>Mycoplasma</i>    | -                     |
| 4382476 | 126.9 | 7.0   | <b>119.9</b> | 0.0014   | Bacteroidetes  | Bacteroidia           | Bacteroidales      | Prevotellaceae     | <i>Prevotella</i>    | -                     |
| 4297119 | 93.6  | 3.7   | <b>89.9</b>  | 0.0014   | Fusobacteria   | Fusobacteria          | Fusobacteriales    | Leptotrichiaceae   | <i>Leptotrichia</i>  | -                     |
| 525942  | 94.6  | 16.9  | <b>77.6</b>  | 0.0194   | Bacteroidetes  | Bacteroidia           | Bacteroidales      | Prevotellaceae     | <i>Prevotella</i>    | <i>melaninogenica</i> |
| 4426165 | 59.0  | 0.9   | <b>58.1</b>  | 0.0373   | Bacteroidetes  | Bacteroidia           | Bacteroidales      | Prevotellaceae     | <i>Prevotella</i>    | -                     |
| 4318284 | 60.2  | 6.1   | <b>54.1</b>  | 0.0599   | Firmicutes     | Clostridia            | Clostridiales      | Veillonellaceae    | <i>Dialister</i>     | -                     |
| 923032  | 31.0  | 0.1   | <b>30.9</b>  | 0.0255   | Fusobacteria   | Fusobacteria          | Fusobacteriales    | Leptotrichiaceae   | <i>Leptotrichia</i>  | -                     |
| 269930  | 22.8  | 0.1   | <b>22.6</b>  | 0.0256   | Proteobacteria | Gammaproteobacteria   | Pseudomonadales    | Pseudomonadaceae   | -                    | -                     |
| 4452538 | 24.3  | 4.5   | <b>19.7</b>  | 0.0077   | Fusobacteria   | Fusobacteria          | Fusobacteriales    | Fusobacteriaceae   | <i>Fusobacterium</i> | -                     |
| 4307309 | 19.5  | 7.5   | <b>12.0</b>  | 1.93E-18 | Fusobacteria   | Fusobacteria          | Fusobacteriales    | Fusobacteriaceae   | <i>Fusobacterium</i> | -                     |
| 4468500 | 24.4  | 12.4  | <b>12.0</b>  | 1.75E-14 | Firmicutes     | Clostridia            | Clostridiales      | Mogibacteriaceae   | <i>Anaerovorax</i>   | -                     |
| 495451  | 11.3  | 1.5   | <b>9.7</b>   | 1.92E-18 | Bacteroidetes  | Bacteroidia           | Bacteroidales      | Porphyromonadaceae | <i>Porphyromonas</i> | -                     |
| 4346863 | 10.9  | 1.2   | <b>9.7</b>   | 0.0094   | Bacteroidetes  | Bacteroidia           | Bacteroidales      | Prevotellaceae     | <i>Prevotella</i>    | -                     |
| 245523  | 18.9  | 9.7   | <b>9.1</b>   | 6.69E-11 | Bacteroidetes  | Bacteroidia           | Bacteroidales      | -                  | -                    | -                     |
| 69782   | 10.4  | 1.7   | <b>8.7</b>   | 1.25E-16 | Proteobacteria | Epsilonproteobacteria | Campylobacteriales | Helicobacteraceae  | <i>Helicobacter</i>  | -                     |
| 28118   | 7.7   | 0.1   | <b>7.5</b>   | 0.0255   | Firmicutes     | Clostridia            | Clostridiales      | Veillonellaceae    | <i>Selenomonas</i>   | -                     |
| 1580    | 7.1   | 0.6   | <b>6.5</b>   | 0.0808   | Bacteroidetes  | Bacteroidia           | Bacteroidales      | Prevotellaceae     | <i>Prevotella</i>    | <i>melaninogenica</i> |
| 4426163 | 7.7   | 1.6   | <b>6.1</b>   | 0.0425   | Bacteroidetes  | Bacteroidia           | Bacteroidales      | Prevotellaceae     | <i>Prevotella</i>    | -                     |
| 1033687 | 5.1   | 0.3   | <b>4.8</b>   | 0.0689   | Bacteroidetes  | Bacteroidia           | Bacteroidales      | Prevotellaceae     | <i>Prevotella</i>    | -                     |
| 92316   | 6.0   | 1.5   | <b>4.5</b>   | 3.52E-08 | Firmicutes     | Clostridia            | Clostridiales      | Lachnospiraceae    | -                    | -                     |
| 62513   | 4.4   | 0.1   | <b>4.3</b>   | 3.52E-05 | Firmicutes     | Clostridia            | Clostridiales      | Lachnospiraceae    | <i>Moryella</i>      | -                     |

| OTU ID  | AA#  | ANA# | AA-ANA      | q-value  | Phylum         | Class                | Order             | Family             | Genus                  | Species               |
|---------|------|------|-------------|----------|----------------|----------------------|-------------------|--------------------|------------------------|-----------------------|
| 523025  | 4.6  | 0.9  | <b>3.7</b>  | 0.0787   | Firmicutes     | Bacilli              | Lactobacillales   | Streptococcaceae   | <i>Streptococcus</i>   | -                     |
| 989074  | 3.4  | 0.1  | <b>3.2</b>  | 0.0002   | Bacteroidetes  | Flavobacteria        | Flavobacteriales  | Flavobacteriaceae  | <i>Campytophaga</i>    | -                     |
| 1304    | 3.0  | 0.1  | <b>2.9</b>  | 0.0044   | Proteobacteria | Betaproteobacteria   | Neisseriales      | Neisseriaceae      | <i>Neisseria</i>       | <i>subflava</i>       |
| 4331815 | 7.5  | 4.8  | <b>2.7</b>  | 0.0212   | Proteobacteria | Alphaproteobacteria  | Sphingomonadales  | Sphingomonadaceae  | -                      | -                     |
| 100791  | 2.7  | 0.1  | <b>2.5</b>  | 0.0009   | Proteobacteria | Betaproteobacteria   | Burkholderiales   | Comamonadaceae     | -                      | -                     |
| 55917   | 3.6  | 1.1  | <b>2.5</b>  | 0.0004   | Bacteroidetes  | Bacteroidia          | Bacteroidales     | -                  | -                      | -                     |
| 831     | 2.5  | 0.3  | <b>2.2</b>  | 0.0897   | Bacteroidetes  | Bacteroidia          | Bacteroidales     | Prevotellaceae     | <i>Prevotella</i>      | -                     |
| 237731  | 3.2  | 1.1  | <b>2.0</b>  | 0.0029   | Firmicutes     | Clostridia           | Clostridiales     | Veillonellaceae    | <i>Selenomonas</i>     | -                     |
| 1465    | 2.1  | 0.1  | <b>2.0</b>  | 0.0033   | Bacteroidetes  | Bacteroidia          | Bacteroidales     | Prevotellaceae     | <i>Prevotella</i>      | <i>intermedia</i>     |
| 4353264 | 3.8  | 1.8  | <b>2.0</b>  | 0.0135   | Proteobacteria | Alphaproteobacteria  | Caulobacteriales  | Caulobacteraceae   | -                      | -                     |
| 4414261 | 2.1  | 0.5  | <b>1.6</b>  | 0.0044   | Firmicutes     | Bacilli              | Lactobacillales   | Lactobacillaceae   | <i>Lactobacillus</i>   | -                     |
| 1066621 | 2.2  | 0.6  | <b>1.6</b>  | 0.0925   | Bacteroidetes  | Bacteroidia          | Bacteroidales     | Prevotellaceae     | <i>Prevotella</i>      | <i>melaninigenica</i> |
| 1188    | 1.4  | 0.1  | <b>1.4</b>  | 0.0449   | Fusobacteria   | Fusobacteria         | Fusobacteriales   | Leptotrichiaceae   | <i>Leptotrichia</i>    | -                     |
| 104313  | 1.2  | 0.3  | <b>0.9</b>  | 0.0696   | Proteobacteria | Gammmaproteobacteria | Pseudomonadales   | Pseudomonadaceae   | <i>Pseudomonas</i>     | -                     |
| 540269  | 0.6  | 1.7  | <b>-1.1</b> | 0.0190   | Firmicutes     | Bacilli              | Bacillales        | Exiguobacteraceae  | -                      | -                     |
| 4423236 | 0.1  | 1.3  | <b>-1.2</b> | 0.0894   | Proteobacteria | Gammmaproteobacteria | Pasteurellales    | Pasteurellaceae    | <i>Aggregatibacter</i> | <i>segnis</i>         |
| 57758   | 0.5  | 1.7  | <b>-1.2</b> | 0.0047   | Bacteroidetes  | Flavobacteria        | Flavobacteriales  | Flavobacteriaceae  | <i>Flavobacterium</i>  | <i>columnare</i>      |
| 4483174 | 0.7  | 2.0  | <b>-1.3</b> | 0.0092   | Fusobacteria   | Fusobacteriia        | Fusobacteriales   | Leptotrichiaceae   | <i>Leptotrichia</i>    | -                     |
| 671258  | 0.4  | 2.1  | <b>-1.7</b> | 8.43E-05 | Actinobacteria | Actinobacteria       | Actinomycetales   | Gordoniaceae       | <i>Gordonia</i>        | -                     |
| 3359884 | 1.5  | 3.3  | <b>-1.8</b> | 0.0043   | Cyanobacteria  | Chloroplast          | Streptophyta      | -                  | -                      | -                     |
| 4375000 | 0.5  | 2.7  | <b>-2.2</b> | 2.70E-06 | Proteobacteria | Gammmaproteobacteria | Enterobacteriales | Enterobacteriaceae | -                      | -                     |
| 470724  | 0.4  | 3.8  | <b>-3.4</b> | 2.37E-10 | Proteobacteria | Betaproteobacteria   | Neisseriales      | Neisseriaceae      | <i>Neisseria</i>       | -                     |
| 339015  | 0.3  | 4.1  | <b>-3.8</b> | 3.65E-11 | Proteobacteria | Betaproteobacteria   | Burkholderiales   | Comamonadaceae     | <i>Hydrogenophaga</i>  | -                     |
| 669486  | 0.8  | 5.3  | <b>-4.4</b> | 2.19E-13 | Firmicutes     | Bacilli              | Lactobacillales   | Streptococcaceae   | <i>Streptococcus</i>   | -                     |
| 1052181 | 1.8  | 6.8  | <b>-5.0</b> | 4.58E-13 | Bacteroidetes  | Bacteroidia          | Bacteroidales     | Prevotellaceae     | <i>Prevotella</i>      | <i>naneciensis</i>    |
| 4335450 | 1.4  | 6.5  | <b>-5.1</b> | 2.75E-14 | Fusobacteria   | Fusobacteria         | Fusobacteriales   | Leptotrichiaceae   | -                      | -                     |
| 4343627 | 0.3  | 5.7  | <b>-5.4</b> | 1.07E-14 | Bacteroidetes  | Bacteroidia          | Bacteroidales     | Bacteroidaceae     | <i>Bacteroides</i>     | <i>fragilis</i>       |
| 903686  | 2.8  | 8.3  | <b>-5.5</b> | 0.0689   | Proteobacteria | Gammmaproteobacteria | Pasteurellales    | Pasteurellaceae    | <i>Aggregatibacter</i> | <i>segnis</i>         |
| 4440670 | 19.8 | 25.3 | <b>-5.5</b> | 0.0055   | Firmicutes     | Clostridia           | Clostridiales     | Veillonellaceae    | <i>Veillonella</i>     | -                     |

| OTU ID  | AA#  | ANA# | AA-ANA | q-value  | Phylum         | Class                 | Order              | Family             | Genus                 | Species               |
|---------|------|------|--------|----------|----------------|-----------------------|--------------------|--------------------|-----------------------|-----------------------|
| 3799784 | 0.9  | 6.5  | -5.6   | 6.52E-17 | Proteobacteria | Gammmaproteobacteria  | Enterobacteriales  | Enterobacteriaceae | -                     | -                     |
| 4309323 | 1.1  | 6.8  | -5.7   | 0.0588   | Proteobacteria | Gammmaproteobacteria  | Pasteurellales     | Pasteurellaceae    | <i>Haemophilus</i>    | -                     |
| 242070  | 1.7  | 8.2  | -6.5   | 2.34E-18 | Proteobacteria | Gammmaproteobacteria  | Pseudomonadales    | Pseudomonadaceae   | <i>Pseudomonas</i>    | -                     |
| 521996  | 0.3  | 7.1  | -6.9   | 0.0007   | Firmicutes     | Bacilli               | Lactobacillales    | Streptococcaceae   | <i>Streptococcus</i>  | -                     |
| 571873  | 0.4  | 7.6  | -7.2   | 1.32E-18 | Proteobacteria | Betaproteobacteria    | Burkholderiales    | Comamonadaceae     | -                     | -                     |
| 95168   | 1.4  | 8.9  | -7.5   | 1.36E-22 | Spirochaetes   | Spirochaetes          | Spirochaetales     | Spirochaetaceae    | <i>Treponema</i>      | -                     |
| 543491  | 0.3  | 8.1  | -7.8   | 6.36E-19 | Actinobacteria | Actinobacteria        | Actinomycetales    | Micrococcaceae     | -                     | -                     |
| 898611  | 1.0  | 9.3  | -8.3   | 3.23E-25 | Firmicutes     | Clostridia            | Clostridiales      | Lachnospiraceae    | <i>Butyrivibrio</i>   | -                     |
| 4428313 | 6.5  | 15.3 | -8.8   | 3.16E-16 | Firmicutes     | Bacilli               | Lactobacillales    | Lactobacillaceae   | <i>Lactobacillus</i>  | -                     |
| 3859    | 11.6 | 20.6 | -9.0   | 3.10E-11 | Spirochaetes   | Spirochaetes          | Spirochaetales     | Spirochaetaceae    | <i>Treponema</i>      | <i>armylorum</i>      |
| 956702  | 0.1  | 9.1  | -9.0   | 0.0615   | Proteobacteria | Gammmaproteobacteria  | Pasteurellales     | Pasteurellaceae    | <i>Haemophilus</i>    | <i>influenzae</i>     |
| 4303688 | 4.1  | 14.5 | -10.4  | 8.09E-26 | Proteobacteria | Betaproteobacteria    | Burkholderiales    | Burkholderiaceae   | <i>Lautropia</i>      | -                     |
| 561636  | 0.1  | 10.9 | -10.8  | 0.0232   | Firmicutes     | Bacilli               | Lactobacillales    | Streptococcaceae   | <i>Streptococcus</i>  | -                     |
| 63117   | 1.9  | 14.7 | -12.9  | 3.41E-39 | Proteobacteria | Betaproteobacteria    | Neisseriales       | Neisseriaceae      | <i>Kingella</i>       | -                     |
| 4386920 | 0.0  | 15.0 | -15.0  | 0.0255   | Proteobacteria | Gammmaproteobacteria  | Pseudomonadales    | Pseudomonadaceae   | <i>Pseudomonas</i>    | -                     |
| 2510538 | 1.6  | 17.5 | -15.9  | 0.0254   | Firmicutes     | Bacilli               | Lactobacillales    | Carnobacteriaceae  | -                     | -                     |
| 4430639 | 7.5  | 24.6 | -17.1  | 0.0254   | Proteobacteria | Gammmaproteobacteria  | Pasteurellales     | Pasteurellaceae    | <i>Haemophilus</i>    | <i>parainfluenzae</i> |
| 353459  | 0.0  | 17.4 | -17.4  | 0.087    | Bacteroidetes  | Bacteroidia           | Bacteroidales      | Prevotellaceae     | <i>Prevotella</i>     | <i>copri</i>          |
| 4443200 | 0.8  | 19.3 | -18.5  | 8.79E-45 | Bacteroidetes  | Flavobacteria         | Flavobacteriales   | Flavobacteriaceae  | <i>Copnocytophaga</i> | <i>ochracea</i>       |
| 4412630 | 2.0  | 22.1 | -20.1  | 0.0271   | Bacteroidetes  | Bacteroidia           | Bacteroidales      | Porphyromonadaceae | <i>Porphyromonas</i>  | -                     |
| 171157  | 8.6  | 31.3 | -22.7  | 1.72E-57 | Proteobacteria | Epsilonproteobacteria | Campylobacteriales | Helicobacteraceae  | <i>Flexispira</i>     | -                     |
| 259631  | 0.0  | 23.0 | -23.0  | 0.0686   | Firmicutes     | Clostridia            | Clostridiales      | Lachnospiraceae    | <i>Ruminococcus</i>   | <i>gnavus</i>         |
| 245     | 0.2  | 25.1 | -25.0  | 0.0043   | Fusobacteria   | Fusobacteria          | Fusobacteriales    | Fusobacteriaceae   | <i>Fusobacterium</i>  | -                     |
| 575     | 2.5  | 28.0 | -25.5  | 0.032    | Bacteroidetes  | Bacteroidia           | Bacteroidales      | Prevotellaceae     | <i>Prevotella</i>     | <i>melaninogenica</i> |
| 4301566 | 10.6 | 37.3 | -26.7  | 0.0172   | Firmicutes     | Bacilli               | Lactobacillales    | Streptococcaceae   | <i>Streptococcus</i>  | -                     |
| 886735  | 21.0 | 47.9 | -26.9  | 1.18E-47 | Firmicutes     | Bacilli               | Lactobacillales    | Aerococcaceae      | <i>Alloiococcus</i>   | -                     |
| 267852  | 5.9  | 33.8 | -27.9  | 1.99E-82 | Proteobacteria | Alphaproteobacteria   | Sphingomonadales   | Sphingomonadaceae  | <i>Sphingopyxis</i>   | <i>alaskensis</i>     |
| 4469032 | 21.9 | 50.2 | -28.3  | 1.74E-50 | Firmicutes     | Bacilli               | Lactobacillales    | -                  | -                     | -                     |
| 995     | 4.0  | 44.7 | -40.6  | 0.010    | Bacteroidetes  | Bacteroidia           | Bacteroidales      | Prevotellaceae     | <i>Prevotella</i>     | <i>melaninogenica</i> |

| OTU ID  | AA #  | ANA # | AA-ANA        | q-value   | Phylum         | Class                 | Order              | Family              | Genus                  | Species               |
|---------|-------|-------|---------------|-----------|----------------|-----------------------|--------------------|---------------------|------------------------|-----------------------|
| 4297222 | 7.1   | 47.9  | <b>-40.9</b>  | 2.03E-123 | Firmicutes     | Bacilli               | Lactobacillales    | Streptococcaceae    | <i>Streptococcus</i>   | -                     |
| 4364176 | 1.3   | 47.9  | <b>-46.6</b>  | 1.99E-97  | Firmicutes     | Erysipelotrichi       | Erysipelotrichales | Erysipelotrichaceae | <i>Sharpea</i>         | -                     |
| 4480189 | 10.0  | 60.8  | <b>-50.8</b>  | 1.45E-151 | Firmicutes     | Bacilli               | Lactobacillales    | Lactobacillaceae    | <i>Lactobacillus</i>   | <i>zeae</i>           |
| 1015518 | 3.1   | 55.8  | <b>-52.7</b>  | 5.83E-143 | Actinobacteria | Actinobacteria        | Actinomycetales    | Corynebacteriaceae  | <i>Corynebacterium</i> | -                     |
| 4466150 | 5.5   | 63.3  | <b>-57.9</b>  | 5.08E-05  | Proteobacteria | Gammmaproteobacteria  | Pasteurellales     | Pasteurellaceae     | <i>Haemophilus</i>     | -                     |
| 4337755 | 30.6  | 94.8  | <b>-64.2</b>  | 0.0255    | Firmicutes     | Bacilli               | Gemellales         | Gemellaceae         | -                      | -                     |
| 1925094 | 8.2   | 75.5  | <b>-67.4</b>  | 5.19E-204 | Actinobacteria | Actinobacteria        | Actinomycetales    | Micrococcaceae      | -                      | -                     |
| 260397  | 3.7   | 77.7  | <b>-74.0</b>  | 2.51E-191 | Firmicutes     | Erysipelotrichi       | Erysipelotrichales | Erysipelotrichaceae | <i>Allobaculum</i>     | -                     |
| 4372058 | 17.6  | 105.2 | <b>-87.6</b>  | 0.026     | Bacteroidetes  | Bacteroidia           | Bacteroidales      | Prevotellaceae      | <i>Prevotella</i>      | <i>melaninogenica</i> |
| 976838  | 7.3   | 98.5  | <b>-91.2</b>  | 2.41E-263 | Proteobacteria | Epsilonproteobacteria | Campylobacteriales | Helicobacteraceae   | <i>Flexispira</i>      | -                     |
| 4335578 | 221.3 | 313.5 | <b>-92.2</b>  | 1.94E-70  | Firmicutes     | Clostridia            | Clostridiales      | Mogibacteriaceae    | -                      | -                     |
| 4459993 | 3.5   | 102.7 | <b>-99.1</b>  | 0.0010    | Bacteroidetes  | Bacteroidia           | Bacteroidales      | Porphyromonadaceae  | <i>Porphyromonas</i>   | -                     |
| 495067  | 1.8   | 103.4 | <b>-101.7</b> | 2.20E-171 | Actinobacteria | Actinobacteria        | Actinomycetales    | Corynebacteriaceae  | <i>Corynebacterium</i> | -                     |
| 134265  | 1.0   | 119.2 | <b>-118.2</b> | 9.40E-137 | Bacteroidetes  | Bacteroidia           | Bacteroidales      | Prevotellaceae      | <i>Prevotella</i>      | -                     |
| 4306587 | 12.7  | 158.2 | <b>-145.5</b> | 0.0156    | Firmicutes     | Clostridia            | Clostridiales      | Veillonellaceae     | <i>Selenomonas</i>     | -                     |
| 4400869 | 10.9  | 167.7 | <b>-156.8</b> | 0.0960    | SRI            | -                     | -                  | -                   | -                      | -                     |
| 891034  | 31.5  | 270.0 | <b>-238.5</b> | 0.0806    | Proteobacteria | Gammmaproteobacteria  | Pasteurellales     | Pasteurellaceae     | <i>Aggregatibacter</i> | -                     |
| 4432431 | 91.3  | 963.7 | <b>-872.4</b> | 0.0006    | Proteobacteria | Gammmaproteobacteria  | Pasteurellales     | Pasteurellaceae     | <i>Aggregatibacter</i> | <i>segnis</i>         |

# mean relative abundance

**Table S7:** Clinical and immunological comparison of T2-high compared to T2-low asthma patients.

| Variable                                  | T2-high asthmatics<br>(n = 10) | T2-low asthmatics<br>(n = 30) | p-value <sup>#</sup> |
|-------------------------------------------|--------------------------------|-------------------------------|----------------------|
| Age (Yrs)                                 | 28 (24-33)                     | 37 (27-43)                    | <b>&lt;0.05</b>      |
| Age of Asthma diagnosis (Yrs)             | 9 (5-24)                       | 9 (5-22)                      | NS                   |
| Duration of Asthma (Yrs)                  | 18 (9-23)                      | 23 (14-29)                    | NS                   |
| ACQ Score (Baseline)*                     | 1.0 (0.8 - 1.3)                | 0.5 (0.2 - 0.7)               | <b>&lt;0.05</b>      |
| % Male                                    | 50%                            | 47%                           | NS <sup>ε</sup>      |
| % White                                   | 60%                            | 60%                           | NS <sup>ε</sup>      |
| BMI                                       | 26 (23 - 30)                   | 26 (23 - 29)                  | NS                   |
| FEV1 % pre-Ab (Baseline)                  | 91 (68 - 110)                  | 86 (76 - 96)                  | NS                   |
| FEV1 % post-Ab (Baseline)                 | 102 (93 - 114)                 | 105 (83 - 105)                | NS                   |
| Change in FEV % (Baseline)                | 15 (7 - 25)                    | 7 (5 - 12)                    | <b>&lt;0.05</b>      |
| FEV1 % pre-Ab (post-ICS)                  | 88 (79 - 97)                   | 95 (90 - 106)                 | NS                   |
| FEV1 % post-Ab (post-ICS)                 | 98 (91 - 105)                  | 103 (98 - 115)                | NS                   |
| Change in FEV % pre-Ab                    | 3 (-4 - 13)                    | 1 (-6 - 4)                    | NS                   |
| Change in FEV % post-Ab                   | 1 (-3 - 5)                     | 0 (-5 - 6)                    | NS                   |
| PC <sub>20</sub> (Baseline)               | 0.9 (0.2 - 3.8)                | 1.3 (0.4 - 2.7)               | NS                   |
| PC <sub>20</sub> (post ICS)               | 6.1 (1.6 - 12.4)               | 1.9 (0.3 - 5.8)               | NS                   |
| Change in PC <sub>20</sub>                | 4.9 (1.2 - 11.5)               | 0.3 (-0.2 - 1.5)              | <b>&lt;0.01</b>      |
| Blood eosinophils (absolute)              | 400 (245 - 600)                | 130 (100 - 293)               | <b>&lt;0.01</b>      |
| Blood eosinophils (%)                     | 6.9 (4.6 - 10.3)               | 2.7 (1.3 - 4.2)               | <b>&lt;0.001</b>     |
| Blood neutrophils (%)                     | 53.5 (43.7 - 60.5)             | 56.1 (49.7 - 62.0)            | NS                   |
| Sputum neutrophils (% Baseline)           | 53.6 (33.9 - 64.9)             | 55.8 (32.5 - 65.2)            | NS                   |
| Sputum neutrophils (% post-ICS)           | 49.5 (32.8 - 59.9)             | 49.4 (25.1 - 60.3)            | NS                   |
| Change in sputum neutrophils              | 0.0 (-24.9 - 16.0)             | -9.6 (-18-1.8)                | NS                   |
| Sputum eosinophils (% Baseline)           | 1.3 (0.4 - 3.8)                | 0.3 (0.0 - 1.0)               | <b>&lt;0.05</b>      |
| Sputum eosinophils (% post-ICS)           | 0.0 (0.0 - 0.4)                | 0.0 (0.0 - 0.2)               | NS                   |
| Change in sputum eosinophils              | 0.0 (-0.7 - 0.1)               | -0.2 (-0.6 - 0.0)             | NS                   |
| Serum IgE (IU/mL)                         | 323.5 (184.3 - 560.5)          | 121.5 (49.0 - 231.3)          | <b>&lt;0.05</b>      |
| Number of positive sIgE <sup>ε</sup>      | 5 (2-10)                       | 6 (3-7)                       | NS <sup>ε</sup>      |
| % Eczema/Allergic dermatitis <sup>§</sup> | 40%                            | 27%                           | NS <sup>ε</sup>      |
| % Allergic rhinitis <sup>§</sup>          | 60%                            | 39%                           | NS <sup>ε</sup>      |

All values are medians (IQR). \*ACQ, Asthma Control Questionnaire. <sup>#</sup>Number of positive specific IgE (sIgE >0.35 KU/l) from a total of 12 aeroallergens tested by ImmunoCap assay. <sup>§</sup>Subjects with a positive history of allergic conditions specified (self-reported). Statistical significance was determined using <sup>#</sup> Mann-Whitney or <sup>ε</sup> Fisher's exact test.





**Table S8:** Clinical and immunological comparison of ICS-responders compared to ICS non-responders.

| Variable                                          | ICS responders<br>(n = 15) | ICS non-responders<br>(n = 10) | p-value <sup>#</sup> |
|---------------------------------------------------|----------------------------|--------------------------------|----------------------|
| Age (YTS)                                         | 32 (27-43)                 | 29 (20-39)                     | NS                   |
| Age of Asthma diagnosis (YTS)                     | 8 (5-22)                   | 5 (2-9)                        | NS                   |
| Duration of Asthma (YTS)                          | 25 (18-27)                 | 21 (13-26)                     | NS                   |
| ACQ Score (Baseline)*                             | 0.8 (0.2 - 1.2)            | 0.6 (0.1 - 1.0)                | NS                   |
| ACQ Score (post ICS)*                             | 0.3 (0.0 - 0.5)            | 0.2 (0.0 - 0.7)                | NS                   |
| % Male                                            | 40%                        | 40%                            | NS <sup>ε</sup>      |
| % White                                           | 47%                        | 70%                            | NS <sup>ε</sup>      |
| BMI                                               | 26 (23 - 29)               | 26 (24 - 28)                   | NS                   |
| FEV1 % pre-Ab (Baseline)                          | 86 (71 - 95)               | 99 (94 - 110)                  | <b>&lt;0.05</b>      |
| FEV1 % post-Ab (Baseline)                         | 101 (85 - 105)             | 105 (100 - 114)                | NS                   |
| Change in FEV with Ab % (Baseline)                | 12 (8 - 15)                | 6 (5 - 7)                      | <b>&lt;0.05</b>      |
| FEV1 % pre-Ab (post-ICS)                          | 88 (79 - 97)               | 95 (90 - 106)                  | NS                   |
| FEV1 % post-Ab (post-ICS)                         | 98 (91 - 105)              | 103 (98 - 115)                 | NS                   |
| Change in FEV % with Ab (post-ICS)                | 12 (5 - 14)                | 10 (5 - 14)                    | NS                   |
| Change in FEV % pre-Ab                            | 3 (-4 - 13)                | 1 (-6 - 4)                     | NS                   |
| Change in FEV % post-Ab                           | 1 (-3 - 5)                 | 0 (-5 - 6)                     | NS                   |
| % Change from baseline in pre-Ab FEV <sub>1</sub> | 3.2 (-4.7 - 11.7)          | 0.4 (-5.3 - 3.3)               | NS                   |
| PC <sub>20</sub> (Baseline)                       | 0.8 (0.3 - 1.2)            | 1.9 (0.3 - 4.1)                | NS                   |
| PC <sub>20</sub> (post ICS)                       | 6.1 (1.6 - 12.4)           | 1.9 (0.3 - 5.8)                | NS                   |
| Change in PC <sub>20</sub>                        | 4.9 (1.2 - 11.5)           | 0.3 (-0.2 - 1.5)               | <b>&lt;0.01</b>      |
| Blood eosinophils (absolute)                      | 200 (100 - 400)            | 155 (100 - 315)                | NS                   |
| Blood eosinophils (%)                             | 3.8 (1.3 - 6.7)            | 3.0 (1.0 - 5.1)                | NS                   |
| Blood neutrophils (%)                             | 53.3 (49.8 - 61.0)         | 58.0 (50.4 - 64.3)             | NS                   |
| Sputum neutrophils (% Baseline)                   | 51.5 (25.6 - 64.2)         | 56.1 (35.0 - 66.7)             | NS                   |
| Sputum neutrophils (% post-ICS)                   | 49.5 (32.8 - 59.9)         | 49.4 (25.1 - 60.3)             | NS                   |
| Change in sputum neutrophils                      | 0.0 (-24.9 - 16.0)         | -9.6 (-18.1.8)                 | NS                   |
| Sputum eosinophils (% Baseline)                   | 0.2 (0.0 - 1.0)            | 0.4 (0.0 - 0.7)                | NS                   |
| Sputum eosinophils (% post-ICS)                   | 0.0 (0.0 - 0.4)            | 0.0 (0.0 - 0.2)                | NS                   |
| Change in sputum eosinophils                      | 0.0 (-0.7 - 0.1)           | -0.2 (-0.6 - 0.0)              | NS                   |
| Serum IgE (IU/mL)                                 | 153.0 (93.0 - 261.0)       | 188.0 (66.8 - 310.8)           | NS                   |

All values are medians (IQR). \*ACQ, Asthma Control Questionnaire. Statistical significance was determined using <sup>#</sup> Mann-Whitney or <sup>ε</sup> Fisher's exact test.

**Table S9:** Specific taxa differentially expressed in ICS non-responders (ICS non-R) compared to ICS responders (ICS-R) at baseline.

| OTU ID  | ICS non-R# | ICS-R# | ICS non-R-R   | q-value   | Phylum         | Class               | Order            | Family             | Genus                 | Species               |
|---------|------------|--------|---------------|-----------|----------------|---------------------|------------------|--------------------|-----------------------|-----------------------|
| 12297   | 9157.6     | 0.5    | <b>9157.1</b> | 1.05E-104 | Actinobacteria | Actinobacteria      | Actinomycetales  | Microbacteriaceae  | -                     | -                     |
| 4406393 | 1111.8     | 0.7    | <b>1111.1</b> | 1.29E-82  | Proteobacteria | Gammaproteobacteria | Pasteurellales   | Pasteurellaceae    | <i>Haemophilus</i>    | -                     |
| 4459021 | 221        | 7.1    | <b>213.9</b>  | 0.0658    | Bacteroidetes  | Bacteroidia         | Bacteroidales    | Porphyromonadaceae | <i>Tannerella</i>     | -                     |
| 4465803 | 210.2      | 3.7    | <b>206.5</b>  | 1.06E-126 | Bacteroidetes  | Bacteroidia         | Bacteroidales    | Porphyromonadaceae | <i>Porphyromonas</i>  | -                     |
| 923032  | 164        | 3.8    | <b>160.2</b>  | 7.45E-112 | Fusobacteria   | Fusobacteria        | Fusobacteriales  | Leptotrichiaceae   | <i>Leptotrichia</i>   | -                     |
| 4426165 | 154        | 8.7    | <b>145.3</b>  | 3.64E-140 | Bacteroidetes  | Bacteroidia         | Bacteroidales    | Prevotellaceae     | <i>Prevotella</i>     | -                     |
| 2654263 | 116.4      | 4.5    | <b>111.9</b>  | 0.0129    | Proteobacteria | Gammaproteobacteria | Pasteurellales   | Pasteurellaceae    | <i>Haemophilus</i>    | <i>parainfluenzae</i> |
| 4437399 | 137.4      | 58.4   | <b>79</b>     | 2.55E-50  | Spirochaetes   | Spirochaetes        | Spirochaetales   | Spirochaetaceae    | <i>Treponema</i>      | -                     |
| 4404220 | 410.2      | 333.7  | <b>76.5</b>   | 5.54E-12  | Proteobacteria | Gammaproteobacteria | Pasteurellales   | Pasteurellaceae    | <i>Actinobacillus</i> | -                     |
| 14920   | 60.6       | 0.2    | <b>60.4</b>   | 2.48E-14  | Firmicutes     | Bacilli             | Gemellales       | Gemellaceae        | <i>Gemella</i>        | -                     |
| 73875   | 84.6       | 26.9   | <b>57.7</b>   | 4.06E-47  | Spirochaetes   | Spirochaetes        | Spirochaetales   | Spirochaetaceae    | <i>Treponema</i>      | -                     |
| 71146   | 108.6      | 52.6   | <b>56</b>     | 1.06E-30  | Spirochaetes   | Spirochaetes        | Spirochaetales   | Spirochaetaceae    | <i>Treponema</i>      | -                     |
| 2613485 | 60.8       | 6.3    | <b>54.5</b>   | 2.20E-58  | Bacteroidetes  | Bacteroidia         | Bacteroidales    | Porphyromonadaceae | <i>Porphyromonas</i>  | -                     |
| 4419376 | 54.4       | 0.6    | <b>53.8</b>   | 4.08E-26  | Bacteroidetes  | Flavobacteria       | Flavobacteriales | Flavobacteriaceae  | <i>Campytophaga</i>   | <i>ochracea</i>       |
| 548730  | 114.4      | 62.3   | <b>52.1</b>   | 3.75E-24  | Bacteroidetes  | Bacteroidia         | Bacteroidales    | Prevotellaceae     | <i>Prevotella</i>     | -                     |
| 949816  | 37.4       | 2.6    | <b>34.8</b>   | 0.0389    | Firmicutes     | Bacilli             | Lactobacillales  | Streptococcaceae   | <i>Streptococcus</i>  | -                     |
| 4376637 | 82.6       | 47.8   | <b>34.8</b>   | 1.24E-14  | Spirochaetes   | Spirochaetes        | Spirochaetales   | Spirochaetaceae    | <i>Treponema</i>      | -                     |
| 968873  | 33.8       | 0.1    | <b>33.7</b>   | 1.63E-07  | Bacteroidetes  | Flavobacteria       | Flavobacteriales | Weeksellaceae      | -                     | -                     |
| 325027  | 33.6       | 1.4    | <b>32.2</b>   | 0.0454    | Proteobacteria | Betaproteobacteria  | Burkholderiales  | Comamonadaceae     | <i>Comamonas</i>      | -                     |
| 4459265 | 42.8       | 12.9   | <b>29.9</b>   | 2.28E-25  | Bacteroidetes  | Bacteroidia         | Bacteroidales    | Paraprevotellaceae | <i>Prevotella</i>     | -                     |
| 1013316 | 29.8       | 0.9    | <b>28.9</b>   | 8.09E-23  | Firmicutes     | Clostridia          | Clostridiales    | Lachnospiraceae    | -                     | -                     |
| 4480189 | 27.2       | 0.4    | <b>26.8</b>   | 3.05E-15  | Firmicutes     | Bacilli             | Lactobacillales  | Lactobacillaceae   | <i>Lactobacillus</i>  | <i>zeae</i>           |
| 4468500 | 58.2       | 36.4   | <b>21.8</b>   | 6.44E-08  | Firmicutes     | Clostridia          | Clostridiales    | Mogibacteriaceae   | <i>Anaerovorax</i>    | -                     |
| 4446973 | 21.8       | 0.1    | <b>21.7</b>   | 0.0716    | Bacteroidetes  | Bacteroidia         | Bacteroidales    | Porphyromonadaceae | <i>Porphyromonas</i>  | -                     |
| 4313722 | 20.4       | 0.4    | <b>20</b>     | 0.0059    | Fusobacteria   | Fusobacteria        | Fusobacteriales  | Fusobacteriaceae   | <i>Fusobacterium</i>  | -                     |
| 4449458 | 23.6       | 5.6    | <b>18</b>     | 0.0545    | Proteobacteria | Gammaproteobacteria | Pseudomonadales  | Moraxellaceae      | <i>Acinetobacter</i>  | -                     |
| 4422512 | 19.6       | 2.1    | <b>17.5</b>   | 5.90E-19  | Tenericutes    | Mollicutes          | Mycoplasmatales  | Mycoplasmataceae   | <i>Mycoplasma</i>     | -                     |
| 886735  | 20.2       | 3.6    | <b>16.6</b>   | 2.32E-17  | Firmicutes     | Bacilli             | Lactobacillales  | Aerococcaceae      | <i>Alloiococcus</i>   | -                     |

| OTU ID  | ICS non-R# | ICS-R# | ICS non-R-R  | q-value  | Phylum         | Class               | Order              | Family              | Genus                  | Species               |
|---------|------------|--------|--------------|----------|----------------|---------------------|--------------------|---------------------|------------------------|-----------------------|
| 46      | 17.6       | 1.3    | <b>16.3</b>  | 6.34E-17 | Actinobacteria | Actinobacteria      | Actinomycetales    | Actinomycetaceae    | <i>Actinomyces</i>     | -                     |
| 4329788 | 33.2       | 19.3   | <b>13.9</b>  | 6.48E-06 | Firmicutes     | Clostridia          | Clostridiales      | -                   | -                      | -                     |
| 269930  | 43.2       | 32.5   | <b>10.7</b>  | 0.0181   | Proteobacteria | Gammaproteobacteria | Pseudomonadales    | Pseudomonadaceae    | -                      | -                     |
| 1157    | 11         | 1.1    | <b>9.9</b>   | 8.65E-11 | Firmicutes     | Bacilli             | Lactobacillales    | Streptococcaceae    | <i>Streptococcus</i>   | -                     |
| 4299087 | 8.2        | 0.3    | <b>7.9</b>   | 0.0389   | Bacteroidetes  | Flavobacteriia      | Flavobacteriales   | Flavobacteriaceae   | <i>Capnocytophaga</i>  | <i>ochracea</i>       |
| 1609    | 7.6        | 0.3    | <b>7.3</b>   | 1.60E-06 | Bacteroidetes  | Bacteroidia         | Bacteroidales      | Prevotellaceae      | <i>Prevotella</i>      | <i>melaninigenica</i> |
| 1076669 | 11.8       | 4.5    | <b>7.3</b>   | 2.31E-05 | Firmicutes     | Bacilli             | Lactobacillales    | Streptococcaceae    | <i>Streptococcus</i>   | -                     |
| 4306773 | 9.8        | 3.3    | <b>6.5</b>   | 2.74E-05 | Fusobacteria   | Fusobacteriia       | Fusobacteriales    | Leptotrichiaceae    | <i>Leptotrichia</i>    | -                     |
| 4329957 | 5.8        | 0.2    | <b>5.6</b>   | 8.21E-05 | Bacteroidetes  | Bacteroidia         | Bacteroidales      | Prevotellaceae      | <i>Prevotella</i>      | -                     |
| 137183  | 6.8        | 1.4    | <b>5.4</b>   | 1.37E-05 | Actinobacteria | Actinobacteria      | Bifidobacteriales  | Bifidobacteriaceae  | -                      | -                     |
| 886264  | 2.6        | 0.6    | <b>2</b>     | 0.0398   | Actinobacteria | Actinobacteria      | Actinomycetales    | Micrococcaceae      | <i>Rothia</i>          | <i>muclaginoso</i>    |
| 43339   | 0.8        | 3.6    | <b>-2.8</b>  | 0.0550   | Firmicutes     | Clostridia          | Clostridiales      | Mogibacteriaceae    | -                      | -                     |
| 645055  | 0.6        | 3.6    | <b>-3</b>    | 0.0390   | Fusobacteria   | Fusobacteriia       | Fusobacteriales    | Fusobacteriaceae    | <i>Fusobacterium</i>   | -                     |
| 968954  | 0.6        | 4.2    | <b>-3.6</b>  | 0.0389   | Firmicutes     | Bacilli             | Lactobacillales    | Streptococcaceae    | <i>Streptococcus</i>   | -                     |
| 1015518 | 1.2        | 4.9    | <b>-3.7</b>  | 0.0176   | Actinobacteria | Actinobacteria      | Actinomycetales    | Corynebacteriaceae  | <i>Corynebacterium</i> | -                     |
| 4306356 | 2.2        | 6      | <b>-3.8</b>  | 0.0325   | Actinobacteria | Actinobacteria      | Actinomycetales    | Actinomycetaceae    | <i>Actinomyces</i>     | -                     |
| 4399781 | 1.2        | 5.1    | <b>-3.9</b>  | 0.0130   | Bacteroidetes  | Bacteroidia         | Bacteroidales      | Prevotellaceae      | <i>Prevotella</i>      | -                     |
| 989074  | 1.2        | 6.4    | <b>-5.2</b>  | 0.0016   | Bacteroidetes  | Flavobacteriia      | Flavobacteriales   | Flavobacteriaceae   | <i>Capnocytophaga</i>  | -                     |
| 1580    | 2.2        | 7.6    | <b>-5.4</b>  | 0.0022   | Bacteroidetes  | Bacteroidia         | Bacteroidales      | Prevotellaceae      | <i>Prevotella</i>      | <i>melaninigenica</i> |
| 591583  | 0.2        | 5.6    | <b>-5.4</b>  | 0.0545   | Firmicutes     | Bacilli             | Lactobacillales    | Streptococcaceae    | <i>Streptococcus</i>   | -                     |
| 4341205 | 3.8        | 9.4    | <b>-5.6</b>  | 0.0056   | Firmicutes     | Clostridia          | Clostridiales      | Lachnospiraceae     | -                      | -                     |
| 965500  | 2.4        | 8.9    | <b>-6.5</b>  | 0.0004   | Firmicutes     | Bacilli             | Lactobacillales    | Streptococcaceae    | <i>Streptococcus</i>   | -                     |
| 254888  | 3.6        | 10.5   | <b>-6.9</b>  | 0.0005   | Proteobacteria | Betaproteobacteria  | Burkholderiales    | Comamonadaceae      | -                      | -                     |
| 1935279 | 0.8        | 9.1    | <b>-8.3</b>  | 0.0125   | Firmicutes     | Bacilli             | Lactobacillales    | Streptococcaceae    | <i>Streptococcus</i>   | -                     |
| 851935  | 0.4        | 9      | <b>-8.6</b>  | 0.0916   | Bacteroidetes  | Bacteroidia         | Bacteroidales      | Prevotellaceae      | <i>Prevotella</i>      | -                     |
| 610111  | 3.4        | 13.1   | <b>-9.7</b>  | 3.71E-06 | Bacteroidetes  | Bacteroidia         | Bacteroidales      | Prevotellaceae      | <i>Prevotella</i>      | -                     |
| 851824  | 1.2        | 12.1   | <b>-10.9</b> | 7.99E-07 | Firmicutes     | Erysipelotrichi     | Erysipelotrichales | Erysipelotrichaceae | <i>Bulleidia</i>       | -                     |
| 124932  | 1.8        | 12.8   | <b>-11</b>   | 3.19E-07 | Spirochaetes   | Spirochaetes        | Spirochaetales     | Spirochaetaceae     | <i>Treponema</i>       | -                     |
| 4306587 | 0.2        | 11.5   | <b>-11.3</b> | 0.0325   | Firmicutes     | Clostridia          | Clostridiales      | Veillonellaceae     | <i>Selenomonas</i>     | -                     |

| OTU ID  | ICS non-R# | ICS-R# | ICS non-R-R | q-value   | Phylum         | Class               | Order            | Family                | Genus                     | Species             |
|---------|------------|--------|-------------|-----------|----------------|---------------------|------------------|-----------------------|---------------------------|---------------------|
| 22951   | 6.4        | 18.2   | -11.8       | 1.15E-06  | Bacteroidetes  | Bacteroidia         | Bacteroidales    | Prevotellaceae        | <i>Prevotella</i>         | -                   |
| 4297119 | 0.2        | 15     | -14.8       | 0.0131    | Fusobacteria   | Fusobacteria        | Fusobacteriales  | Leptotrichiaceae      | <i>Leptotrichia</i>       | -                   |
| 4373910 | 0.8        | 16     | -15.2       | 8.52E-08  | Proteobacteria | Betaproteobacteria  | Neisseriales     | Neisseriaceae         | <i>Neisseria</i>          | -                   |
| 4440670 | 2.6        | 19.9   | -17.3       | 3.30E-11  | Firmicutes     | Clostridia          | Clostridiales    | Veillonellaceae       | <i>Veillonella</i>        | -                   |
| 1044611 | 1.6        | 23.9   | -22.3       | 1.61E-12  | Firmicutes     | Clostridia          | Clostridiales    | Peptostreptococcaceae | -                         | -                   |
| 537098  | 125.6      | 150.9  | -25.3       | 0.0020    | Firmicutes     | Clostridia          | Clostridiales    | Lachnospiraceae       | -                         | -                   |
| 86      | 1.4        | 28.5   | -27.1       | 0.0155    | Bacteroidetes  | Bacteroidia         | Bacteroidales    | Paraprevotellaceae    | <i>Prevotella</i>         | -                   |
| 4310395 | 25.8       | 57.8   | -32         | 3.94E-15  | Firmicutes     | Clostridia          | Clostridiales    | Lachnospiraceae       | <i>Oribacterium</i>       | -                   |
| 4466006 | 5.2        | 46.9   | -41.7       | 0.0863    | Actinobacteria | Actinobacteria      | Actinomycetales  | Micrococcaceae        | <i>Rothia</i>             | <i>dentocariosa</i> |
| 4313608 | 12.8       | 56.4   | -43.6       | 1.16E-27  | Bacteroidetes  | Bacteroidia         | Bacteroidales    | -                     | -                         | -                   |
| 245523  | 0.2        | 47.7   | -47.5       | 1.07E-06  | Bacteroidetes  | Bacteroidia         | Bacteroidales    | -                     | -                         | -                   |
| 642465  | 0.2        | 52.1   | -51.9       | 0.0233    | Bacteroidetes  | Bacteroidia         | Bacteroidales    | Prevotellaceae        | <i>Prevotella</i>         | -                   |
| 2438396 | 21.2       | 98.8   | -77.6       | 1.93E-49  | Fusobacteria   | Fusobacteria        | Fusobacteriales  | Fusobacteriaceae      | <i>Fusobacterium</i>      | -                   |
| 4330849 | 6.6        | 92.4   | -85.8       | 2.08E-48  | SR1            | -                   | -                | -                     | -                         | -                   |
| 4344371 | 2          | 94.1   | -92.1       | 4.52E-32  | Proteobacteria | Alphaproteobacteria | Sphingomonadales | Sphingomonadaceae     | <i>Sphingomonas</i>       | -                   |
| 1053321 | 17         | 110.2  | -93.2       | 5.59E-60  | Proteobacteria | Gammaproteobacteria | Pseudomonadales  | Moraxellaceae         | <i>Moraxella</i>          | -                   |
| 4335578 | 117.4      | 236    | -118.6      | 6.17E-50  | Firmicutes     | Clostridia          | Clostridiales    | Mogibacteriaceae      | -                         | -                   |
| 4404577 | 253.4      | 388.7  | -135.3      | 3.41E-38  | Firmicutes     | Clostridia          | Clostridiales    | Peptostreptococcaceae | <i>Peptostreptococcus</i> | -                   |
| 4455767 | 56.8       | 206.1  | -149.3      | 0.0597    | Firmicutes     | Bacilli             | Lactobacillales  | Streptococcaceae      | <i>Streptococcus</i>      | -                   |
| 252843  | 54.4       | 215.3  | -160.9      | 2.22E-99  | Fusobacteria   | Fusobacteria        | Fusobacteriales  | Leptotrichiaceae      | <i>Leptotrichia</i>       | -                   |
| 4448497 | 0.8        | 165.9  | -165.1      | 0.0006    | Bacteroidetes  | Bacteroidia         | Bacteroidales    | Paraprevotellaceae    | <i>Prevotella</i>         | <i>tannerae</i>     |
| 4308793 | 35.2       | 270.2  | -235        | 0.0389    | Fusobacteria   | Fusobacteria        | Fusobacteriales  | Fusobacteriaceae      | <i>Fusobacterium</i>      | -                   |
| 4363066 | 9.8        | 333.7  | -323.9      | 0.0568    | Proteobacteria | Gammaproteobacteria | Pasteurellales   | Pasteurellaceae       | <i>Aggregatibacter</i>    | -                   |
| 2469654 | 41.2       | 399.4  | -358.2      | 1.68E-219 | Bacteroidetes  | Bacteroidia         | Bacteroidales    | Paraprevotellaceae    | <i>Prevotella</i>         | -                   |
| 4439603 | 1030       | 2727.2 | -1697.2     | 0.0127    | Firmicutes     | Bacilli             | Lactobacillales  | Streptococcaceae      | <i>Streptococcus</i>      | -                   |

# mean relative abundance

**Table S10:** Predicted KEGG pathways enriched in ICS non-responders compared to ICS responders at baseline.

| ICS non-responders | ICS-responders | ICS non-responders - | KEGG Super-pathways                         | KEGG pathways                                       |
|--------------------|----------------|----------------------|---------------------------------------------|-----------------------------------------------------|
| 96668              | 6133           | <b>90535</b>         | Amino Acid Metabolism                       | Alanine, aspartate and glutamate metabolism         |
| 346121             | 163683         | <b>182438</b>        | Amino Acid Metabolism                       | Amino acid related enzymes                          |
| 67400              | 48235          | <b>19165</b>         | Amino Acid Metabolism                       | Arginine and proline metabolism                     |
| 171954             | 78691          | <b>93263</b>         | Amino Acid Metabolism                       | Cysteine and methionine metabolism                  |
| 231976             | 121154         | <b>110822</b>        | Amino Acid Metabolism                       | Glycine, serine and threonine metabolism            |
| 54604              | 16710          | <b>37894</b>         | Amino Acid Metabolism                       | Lysine degradation                                  |
| 46299              | 268            | <b>46031</b>         | Amino Acid Metabolism                       | Phenylalanine metabolism                            |
| 159693             | 49782          | <b>109911</b>        | Amino Acid Metabolism                       | Phenylalanine, tyrosine and tryptophan biosynthesis |
| 44                 | 12             | <b>32</b>            | Amino Acid Metabolism                       | Tryptophan metabolism                               |
| 51684              | 20667          | <b>31017</b>         | Amino Acid Metabolism                       | Tyrosine metabolism                                 |
| 317294             | 205019         | <b>112275</b>        | Amino Acid Metabolism                       | Valine, leucine and isoleucine biosynthesis         |
| 276968             | 119360         | <b>157608</b>        | Amino Acid Metabolism                       | Valine, leucine and isoleucine degradation          |
| 46198              | 546            | <b>45652</b>         | Biosynthesis of Other Secondary Metabolites | Novobiocin biosynthesis                             |
| 4388               | 18964          | <b>-14576</b>        | Biosynthesis of Other Secondary Metabolites | Penicillin and cephalosporin biosynthesis           |
| 9285               | 36231          | <b>-26946</b>        | Biosynthesis of Other Secondary Metabolites | Phenylpropanoid biosynthesis                        |
| 149876             | 160184         | <b>-10308</b>        | Carbohydrate Metabolism                     | Amino sugar and nucleotide sugar metabolism         |
| 93433              | 4694           | <b>88739</b>         | Carbohydrate Metabolism                     | Ascorbate and aldarate metabolism                   |
| 413978             | 211294         | <b>202684</b>        | Carbohydrate Metabolism                     | Butanoate metabolism                                |
| 151818             | 133288         | <b>18530</b>         | Carbohydrate Metabolism                     | C5-Branched dibasic acid metabolism                 |
| 510250             | 246694         | <b>263556</b>        | Carbohydrate Metabolism                     | Citrate cycle (TCA cycle)                           |
| 91488              | 115716         | <b>-24228</b>        | Carbohydrate Metabolism                     | Fructose and mannose metabolism                     |
| 26877              | 108183         | <b>-81306</b>        | Carbohydrate Metabolism                     | Galactose metabolism                                |
| 542521             | 327948         | <b>214573</b>        | Carbohydrate Metabolism                     | Glycolysis / Gluconeogenesis                        |
| 83375              | 82142          | <b>1233</b>          | Carbohydrate Metabolism                     | Inositol phosphate metabolism                       |
| 116722             | 70965          | <b>45757</b>         | Carbohydrate Metabolism                     | Pentose and glucuronate interconversions            |
| 309090             | 182603         | <b>126487</b>        | Carbohydrate Metabolism                     | Pentose phosphate pathway                           |
| 96668              | 6133           | <b>90535</b>         | Carbohydrate Metabolism                     | Propanoate metabolism                               |
| 455675             | 229990         | <b>225685</b>        | Carbohydrate Metabolism                     | Pyruvate metabolism                                 |

| ICS non-responders | ICS-responders | ICS non-responders - | KEGG Super-pathways                | KEGG pathways                                   |
|--------------------|----------------|----------------------|------------------------------------|-------------------------------------------------|
| 14444              | 64173          | <b>-49729</b>        | Carbohydrate Metabolism            | Starch and sucrose metabolism                   |
| 109950             | 42064          | <b>67886</b>         | Cell Motility                      | Bacterial motility proteins                     |
| 62488              | 39219          | <b>23269</b>         | Cellular Processes and Signaling   | Electron transfer carriers                      |
| 2                  | 57             | <b>-55</b>           | Cellular Processes and Signaling   | Germination                                     |
| 57202              | 31502          | <b>25700</b>         | Cellular Processes and Signaling   | Inorganic ion transport and metabolism          |
| 29671              | 112498         | <b>-82827</b>        | Cellular Processes and Signaling   | Membrane and intracellular structural molecules |
| 79239              | 102277         | <b>-23038</b>        | Cellular Processes and Signaling   | Other ion-coupled transporters                  |
| 46318              | 902            | <b>45416</b>         | Cellular Processes and Signaling   | Other transporters                              |
| 101147             | 21454          | <b>79693</b>         | Cellular Processes and Signaling   | Signal transduction mechanisms                  |
| 37                 | 155            | <b>-118</b>          | Cellular Processes and Signaling   | Sporulation                                     |
| 85232              | 82785          | <b>2447</b>          | Energy Metabolism                  | Carbon fixation in photosynthetic organisms     |
| 48202              | 4851           | <b>43351</b>         | Energy Metabolism                  | Carbon fixation pathways in prokaryotes         |
| 64518              | 40288          | <b>24230</b>         | Energy Metabolism                  | Methane metabolism                              |
| 61571              | 38894          | <b>22677</b>         | Energy Metabolism                  | Nitrogen metabolism                             |
| 373876             | 9573           | <b>364303</b>        | Energy Metabolism                  | Oxidative phosphorylation                       |
| 1540               | 420            | <b>1120</b>          | Energy Metabolism                  | Photosynthesis                                  |
| 396                | 108            | <b>288</b>           | Energy Metabolism                  | Photosynthesis - antenna proteins               |
| 54942              | 11504          | <b>43438</b>         | Energy Metabolism                  | Photosynthesis proteins                         |
| 332715             | 262004         | <b>70711</b>         | Enzyme Families                    | Peptidases                                      |
| 63873              | 37500          | <b>26373</b>         | Enzyme Families                    | Protein kinases                                 |
| 188379             | 99634          | <b>88745</b>         | Folding, Sorting and Degradation   | Protein export                                  |
| 67735              | 42062          | <b>25673</b>         | Folding, Sorting and Degradation   | RNA degradation                                 |
| 103067             | 21437          | <b>81630</b>         | Folding, Sorting and Degradation   | Sulfur relay system                             |
| 48173              | 2656           | <b>45517</b>         | Genetic Information Processing     | Protein folding and associated processing       |
| 120672             | 63480          | <b>57192</b>         | Genetic Information Processing     | Replication, recombination and repair proteins  |
| 166228             | 69731          | <b>96497</b>         | Genetic Information Processing     | Translation proteins                            |
| 10512              | 43144          | <b>-32632</b>        | Glycan Biosynthesis and Metabolism | Glycosaminoglycan degradation                   |
| 62858              | 48757          | <b>14101</b>         | Glycan Biosynthesis and Metabolism | Glycosyltransferases                            |

| ICS non-responders | ICS-responders | ICS non-responders - | KEGG Super-pathways                  | KEGG pathways                                            |
|--------------------|----------------|----------------------|--------------------------------------|----------------------------------------------------------|
| 5520               | 22647          | <b>-17127</b>        | Glycan Biosynthesis and Metabolism   | Lipopolysaccharide biosynthesis proteins                 |
| 191120             | 126883         | <b>64237</b>         | Glycan Biosynthesis and Metabolism   | Peptidoglycan biosynthesis                               |
| 50687              | 12248          | <b>38439</b>         | Lipid Metabolism                     | Fatty acid biosynthesis                                  |
| 51658              | 20661          | <b>30997</b>         | Lipid Metabolism                     | Fatty acid metabolism                                    |
| 44                 | 12             | <b>32</b>            | Lipid Metabolism                     | Glycerolipid metabolism                                  |
| 4                  | 140            | <b>-136</b>          | Lipid Metabolism                     | Lipid biosynthesis proteins                              |
| 25                 | 12             | <b>13</b>            | Lipid Metabolism                     | Steroid biosynthesis                                     |
| 1036463            | 799357         | <b>237106</b>        | Membrane Transport                   | ABC transporters                                         |
| 188379             | 99634          | <b>88745</b>         | Membrane Transport                   | Bacterial secretion system                               |
| 42102              | 177864         | <b>-135762</b>       | Membrane Transport                   | Phosphotransferase system (PTS)                          |
| 480439             | 264215         | <b>216224</b>        | Membrane Transport                   | Secretion system                                         |
| 1233749            | 1031431        | <b>202318</b>        | Membrane Transport                   | Transporters                                             |
| 7503               | 30877          | <b>-23374</b>        | Metabolism                           | Amino acid metabolism                                    |
| 44                 | 12             | <b>32</b>            | Metabolism                           | Biosynthesis and biodegradation of secondary metabolites |
| 53520              | 15503          | <b>38017</b>         | Metabolism                           | Carbohydrate metabolism                                  |
| 70507              | 69838          | <b>669</b>           | Metabolism                           | Energy metabolism                                        |
| 88                 | 24             | <b>64</b>            | Metabolism                           | Lipid metabolism                                         |
| 3010               | 11274          | <b>-8264</b>         | Metabolism                           | Metabolism of cofactors and vitamins                     |
| 53                 | 21             | <b>32</b>            | Metabolism                           | Nucleotide metabolism                                    |
| 315074             | 248847         | <b>66227</b>         | Metabolism                           | Others                                                   |
| 127273             | 82607          | <b>44666</b>         | Metabolism of Cofactors and Vitamins | Folate biosynthesis                                      |
| 121296             | 59194          | <b>62102</b>         | Metabolism of Cofactors and Vitamins | Lipolic acid metabolism                                  |
| 61527              | 38882          | <b>22645</b>         | Metabolism of Cofactors and Vitamins | Nicotinate and nicotinamide metabolism                   |
| 128513             | 82153          | <b>46360</b>         | Metabolism of Cofactors and Vitamins | One carbon pool by folate                                |
| 209922             | 168515         | <b>41407</b>         | Metabolism of Cofactors and Vitamins | Pantothenate and CoA biosynthesis                        |
| 448003             | 159144         | <b>288859</b>        | Metabolism of Cofactors and Vitamins | Porphyrin and chlorophyll metabolism                     |
| 51658              | 20661          | <b>30997</b>         | Metabolism of Cofactors and Vitamins | Retinol metabolism                                       |
| 404632             | 189043         | <b>215589</b>        | Metabolism of Cofactors and Vitamins | Riboflavin metabolism                                    |



| ICS non-responders | ICS-responders | ICS non-responders - | KEGG Super-pathways                       | KEGG pathways                                           |
|--------------------|----------------|----------------------|-------------------------------------------|---------------------------------------------------------|
| 988                | 642            | <b>346</b>           | Metabolism of Cofactors and Vitamins      | Thiamine metabolism                                     |
| 53810              | 15689          | <b>38121</b>         | Metabolism of Cofactors and Vitamins      | Ubiquinone and other terpenoid-quinone biosynthesis     |
| 96668              | 6133           | <b>90535</b>         | Metabolism of Other Amino Acids           | beta-Alanine metabolism                                 |
| 9285               | 36231          | <b>-26946</b>        | Metabolism of Other Amino Acids           | Cyanoamino acid metabolism                              |
| 244909             | 142175         | <b>102734</b>        | Metabolism of Other Amino Acids           | Glutathione metabolism                                  |
| 1731               | 602            | <b>1129</b>          | Metabolism of Other Amino Acids           | Phosphonate and phosphinate metabolism                  |
| 68889              | 57393          | <b>11496</b>         | Metabolism of Other Amino Acids           | Selenocompound metabolism                               |
| 53634              | 15641          | <b>37993</b>         | Metabolism of Terpenoids and Polyketides  | Biosynthesis of siderophore group nonribosomal peptides |
| 195                | 50             | <b>145</b>           | Metabolism of Terpenoids and Polyketides  | Carotenoid biosynthesis                                 |
| 319432             | 117227         | <b>202205</b>        | Metabolism of Terpenoids and Polyketides  | Prenyltransferases                                      |
| 368339             | 126713         | <b>241626</b>        | Metabolism of Terpenoids and Polyketides  | Terpenoid backbone biosynthesis                         |
| 409304             | 360629         | <b>48675</b>         | Nucleotide Metabolism                     | Purine metabolism                                       |
| 170310             | 80320          | <b>89990</b>         | Nucleotide Metabolism                     | Pyrimidine metabolism                                   |
| 306381             | 206945         | <b>99436</b>         | Replication and Repair                    | Base excision repair                                    |
| 306381             | 206945         | <b>99436</b>         | Replication and Repair                    | DNA repair and recombination proteins                   |
| 44                 | 12             | <b>32</b>            | Signal Transduction                       | Calcium signaling pathway                               |
| 180412             | 87533          | <b>92879</b>         | Signal Transduction                       | Two-component system                                    |
| 10512              | 43144          | <b>-32632</b>        | Signaling Molecules and Interaction       | Bacterial toxins                                        |
| 257807             | 183480         | <b>74327</b>         | Transcription                             | Transcription factors                                   |
| 642256             | 442093         | <b>200163</b>        | Translation                               | Aminoacyl-tRNA biosynthesis                             |
| 270199             | 206858         | <b>63341</b>         | Translation                               | Ribosome Biogenesis                                     |
| 54816              | 18151          | <b>36665</b>         | Translation                               | Ribosome biogenesis in eukaryotes                       |
| 79                 | 2              | <b>77</b>            | Xenobiotics Biodegradation and Metabolism | Aminobenzoate degradation                               |
| 578                | 146            | <b>432</b>           | Xenobiotics Biodegradation and Metabolism | Benzoate degradation                                    |
| 26                 | 6              | <b>20</b>            | Xenobiotics Biodegradation and Metabolism | Caprolactam degradation                                 |
| 51658              | 20661          | <b>30997</b>         | Xenobiotics Biodegradation and Metabolism | Chloroalkane and chloroalkene degradation               |
| 51658              | 20661          | <b>30997</b>         | Xenobiotics Biodegradation and Metabolism | Drug metabolism - cytochrome P450                       |
| 51685              | 21169          | <b>30516</b>         | Xenobiotics Biodegradation and Metabolism | Metabolism of xenobiotics by cytochrome P450            |

| ICS non-responders | ICS-responders | ICS non-responders - responders | KEGG Super-pathways                       | KEGG pathways                               |
|--------------------|----------------|---------------------------------|-------------------------------------------|---------------------------------------------|
| 51658              | 20661          | <b>30997</b>                    | Xenobiotics Biodegradation and Metabolism | Naphthalene degradation                     |
| 121                | 27             | <b>94</b>                       | Xenobiotics Biodegradation and Metabolism | Polycyclic aromatic hydrocarbon degradation |
| 26                 | 6              | <b>20</b>                       | Xenobiotics Biodegradation and Metabolism | Toluene degradation                         |
| 26                 | 6              | <b>20</b>                       | Xenobiotics Biodegradation and Metabolism | Xylene degradation                          |

**Table S11 : Specific taxa differentially expressed in placebo treated asthmatics post-treatment compared to baseline (pre-treatment) visit.**

| OTU ID  | Post-# | Pre-# | Post - Pre   | q-value   | Phylum         | Class               | Order            | Family             | Genus                  | Species           |
|---------|--------|-------|--------------|-----------|----------------|---------------------|------------------|--------------------|------------------------|-------------------|
| 4401186 | 195.3  | 0.5   | <b>194.8</b> | 0.0013    | Proteobacteria | Betaproteobacteria  | Neisseriales     | Neisseriaceae      | <i>Elkenella</i>       | -                 |
| 4404731 | 241.0  | 71.6  | <b>169.4</b> | 3.27E-140 | Actinobacteria | Actinobacteria      | Actinomycetales  | Corynebacteriaceae | <i>Corynebacterium</i> | -                 |
| 4469492 | 183.6  | 16.4  | <b>167.3</b> | 0.0009    | Proteobacteria | Betaproteobacteria  | Burkholderiales  | Comamonadaceae     | <i>Deftria</i>         | -                 |
| 269930  | 129.9  | 12.0  | <b>117.9</b> | 0.0051    | Proteobacteria | Gammaproteobacteria | Pseudomonadales  | Pseudomonadaceae   | -                      | -                 |
| 615020  | 39.4   | 0.9   | <b>38.5</b>  | 7.57E-31  | Tenericutes    | Mollicutes          | Mycoplasmatales  | Mycoplasmataceae   | <i>Mycoplasma</i>      | -                 |
| 87506   | 31.3   | 4.1   | <b>27.1</b>  | 0.0904    | Proteobacteria | Betaproteobacteria  | Neisseriales     | Neisseriaceae      | <i>Eikenella</i>       | -                 |
| 4366487 | 23.4   | 2.6   | <b>20.8</b>  | 0.0951    | Bacteroidetes  | Flavobacteria       | Flavobacteriales | Flavobacteriaceae  | <i>Capnocytophaga</i>  | -                 |
| 1566691 | 16.8   | 0.8   | <b>16.0</b>  | 0.0040    | Proteobacteria | Gammaproteobacteria | Pseudomonadales  | Pseudomonadaceae   | <i>Pseudomonas</i>     | -                 |
| 495451  | 19.5   | 10.6  | <b>8.9</b>   | 0.0009    | Bacteroidetes  | Bacteroidia         | Bacteroidales    | Porphyromonadaceae | <i>Porphyromonas</i>   | -                 |
| 245523  | 14.0   | 6.3   | <b>7.8</b>   | 0.0004    | Bacteroidetes  | Bacteroidia         | Bacteroidales    | -                  | -                      | -                 |
| 63117   | 10.1   | 2.6   | <b>7.5</b>   | 0.0010    | Proteobacteria | Betaproteobacteria  | Neisseriales     | Neisseriaceae      | <i>Kingella</i>        | -                 |
| 240252  | 7.6    | 0.6   | <b>7.0</b>   | 2.40E-05  | Proteobacteria | Alphaproteobacteria | Rhodospirillales | Acetobacteraceae   | <i>Acidocella</i>      | -                 |
| 1052181 | 7.8    | 2.9   | <b>4.9</b>   | 1.47E-09  | Bacteroidetes  | Bacteroidia         | Bacteroidales    | Prevotellaceae     | <i>Prevotella</i>      | <i>nanciensis</i> |
| 763967  | 5.0    | 0.1   | <b>4.9</b>   | 0.0658    | Bacteroidetes  | Bacteroidia         | Bacteroidales    | Prevotellaceae     | <i>Prevotella</i>      | -                 |
| 4305935 | 5.9    | 1.4   | <b>4.5</b>   | 0.0066    | Bacteroidetes  | Bacteroidia         | Bacteroidales    | Porphyromonadaceae | <i>Paludibacter</i>    | -                 |
| 399903  | 5.4    | 0.9   | <b>4.5</b>   | 0.0010    | Spirochaetes   | Spirochaetes        | Spirochaetales   | Spirochaetaceae    | <i>Treponema</i>       | -                 |
| 937813  | 4.5    | 0.3   | <b>4.3</b>   | 0.0241    | Firmicutes     | Clostridia          | Clostridiales    | Tissierellaceae    | <i>Anaerococcus</i>    | -                 |
| 458     | 4.9    | 0.8   | <b>4.1</b>   | 0.0099    | Proteobacteria | Gammaproteobacteria | Pasteuriales     | Pasteurellaceae    | <i>Aggregatibacter</i> | -                 |
| 886735  | 6.0    | 2.1   | <b>3.9</b>   | 0.0154    | Firmicutes     | Bacilli             | Lactobacillales  | Aerococcaceae      | <i>Alloiococcus</i>    | -                 |
| 676367  | 3.8    | 0.3   | <b>3.5</b>   | 0.0423    | Firmicutes     | Clostridia          | Clostridiales    | Veillonellaceae    | <i>Schwartzia</i>      | -                 |

| OTU ID  | Post-# | Pre-# | Post - Pre   | q-value  | Phylum         | Class                | Order             | Family                | Genus                  | Species               |
|---------|--------|-------|--------------|----------|----------------|----------------------|-------------------|-----------------------|------------------------|-----------------------|
| 839     | 3.4    | 0.3   | <b>3.1</b>   | 0.0013   | Proteobacteria | Betaproteobacteria   | Neisseriales      | Neisseriaceae         | -                      | -                     |
| 4365143 | 3.1    | 0.1   | <b>3.0</b>   | 0.0792   | Actinobacteria | Actinobacteria       | Actinomycetales   | Corynebacteriaceae    | <i>Corynebacterium</i> | -                     |
| 686900  | 4.4    | 1.8   | <b>2.6</b>   | 0.0059   | Firmicutes     | Clostridia           | Clostridiales     | Lachnospiraceae       | <i>Oribacterium</i>    | -                     |
| 4312347 | 2.4    | 0.6   | <b>1.8</b>   | 0.0350   | Proteobacteria | Gammmaproteobacteria | Cardiobacteriales | Cardiobacteriaceae    | <i>Cardiobacterium</i> | -                     |
| 92721   | 1.9    | 0.6   | <b>1.3</b>   | 0.0029   | Actinobacteria | Actinobacteria       | Actinomycetales   | Actinomycetaceae      | <i>Actinomyces</i>     | -                     |
| 887744  | 1.9    | 0.6   | <b>1.3</b>   | 0.0404   | Bacteroidetes  | Flavobacteria        | Flavobacteriales  | Weeksellaceae         | -                      | -                     |
| 4420570 | 1.8    | 1.6   | <b>0.1</b>   | 0.0902   | Cyanobacteria  | Chloroplast          | Streptophyta      | -                     | -                      | -                     |
| 844535  | 0.8    | 2.0   | <b>-1.3</b>  | 0.0350   | Proteobacteria | Alphaproteobacteria  | Caulobacteriales  | Caulobacteraceae      | <i>Asticcacaulis</i>   | -                     |
| 2758    | 0.4    | 2.1   | <b>-1.8</b>  | 0.0137   | Fusobacteria   | Fusobacteriia        | Fusobacteriales   | Leptotrichiaceae      | <i>Leptotrichia</i>    | -                     |
| 299830  | 0.8    | 3.0   | <b>-2.3</b>  | 0.0904   | Bacteroidetes  | Bacteroidia          | Bacteroidales     | Prevotellaceae        | <i>Prevotella</i>      | <i>copri</i>          |
| 506     | 0.3    | 3.3   | <b>-3.0</b>  | 0.0668   | Bacteroidetes  | Bacteroidia          | Bacteroidales     | Prevotellaceae        | <i>Prevotella</i>      | -                     |
| 551109  | 0.3    | 3.4   | <b>-3.1</b>  | 0.0658   | Proteobacteria | Alphaproteobacteria  | Caulobacteriales  | Caulobacteraceae      | <i>Asticcacaulis</i>   | -                     |
| 1066621 | 1.0    | 4.3   | <b>-3.3</b>  | 0.0951   | Bacteroidetes  | Bacteroidia          | Bacteroidales     | Prevotellaceae        | <i>Prevotella</i>      | <i>melaninogenica</i> |
| 425     | 0.3    | 3.6   | <b>-3.4</b>  | 0.0409   | Bacteroidetes  | Bacteroidia          | Bacteroidales     | Prevotellaceae        | <i>Prevotella</i>      | <i>melaninogenica</i> |
| 1536    | 0.5    | 4.3   | <b>-3.8</b>  | 0.0423   | Firmicutes     | Bacilli              | Gemellales        | -                     | -                      | -                     |
| 943     | 0.3    | 4.0   | <b>-3.8</b>  | 0.0608   | Fusobacteria   | Fusobacteriia        | Fusobacteriales   | Leptotrichiaceae      | <i>Leptotrichia</i>    | -                     |
| 1643    | 0.4    | 4.8   | <b>-4.4</b>  | 0.0404   | Bacteroidetes  | Bacteroidia          | Bacteroidales     | Prevotellaceae        | <i>Prevotella</i>      | <i>melaninogenica</i> |
| 4457085 | 0.5    | 5.0   | <b>-4.5</b>  | 2.30E-05 | GN02           | BD1-5                | -                 | -                     | -                      | -                     |
| 301     | 0.1    | 4.6   | <b>-4.5</b>  | 0.0792   | Bacteroidetes  | Bacteroidia          | Bacteroidales     | Prevotellaceae        | <i>Prevotella</i>      | -                     |
| 68416   | 0.1    | 4.8   | <b>-4.6</b>  | 0.0340   | Bacteroidetes  | Bacteroidia          | Bacteroidales     | Prevotellaceae        | <i>Prevotella</i>      | -                     |
| 3530625 | 0.3    | 6.0   | <b>-5.8</b>  | 0.0071   | Proteobacteria | Gammmaproteobacteria | Pseudomonadales   | Moraxellaceae         | <i>Acinetobacter</i>   | -                     |
| 250288  | 5.8    | 11.5  | <b>-5.8</b>  | 6.95E-12 | Firmicutes     | Clostridia           | Clostridiales     | Peptostreptococcaceae | -                      | -                     |
| 133961  | 0.5    | 7.3   | <b>-6.8</b>  | 9.90E-05 | Proteobacteria | Gammmaproteobacteria | Pseudomonadales   | Pseudomonadaceae      | <i>Pseudomonas</i>     | -                     |
| 105     | 0.8    | 8.4   | <b>-7.6</b>  | 0.0608   | Bacteroidetes  | Bacteroidia          | Bacteroidales     | Prevotellaceae        | <i>Prevotella</i>      | -                     |
| 274365  | 0.3    | 9.5   | <b>-9.3</b>  | 0.0010   | Proteobacteria | Gammmaproteobacteria | Enterobacteriales | Enterobacteriaceae    | -                      | -                     |
| 4459265 | 2.3    | 11.6  | <b>-9.4</b>  | 1.49E-23 | Bacteroidetes  | Bacteroidia          | Bacteroidales     | Paraprevotellaceae    | <i>Prevotella</i>      | -                     |
| 734     | 2.4    | 13.8  | <b>-11.4</b> | 0.0404   | Actinobacteria | Actinobacteria       | Actinomycetales   | Actinomycetaceae      | <i>Actinomyces</i>     | -                     |
| 43339   | 4.5    | 24.9  | <b>-20.4</b> | 4.64E-11 | Firmicutes     | Clostridia           | Clostridiales     | Mogibacteriaceae      | -                      | -                     |
| 594026  | 2.6    | 65.9  | <b>-63.3</b> | 0.0552   | Bacteroidetes  | Bacteroidia          | Bacteroidales     | Prevotellaceae        | <i>Prevotella</i>      | -                     |

# mean relative abundance

**Table S12:** Specific taxa differentially expressed in ICS treated asthmatics post-treatment compared to baseline (pre-treatment) visit.

| OTU ID  | Post-# | Pre-# | Post - Pre    | q-value  | Phylum         | Class               | Order              | Family              | Genus                  | Species               |
|---------|--------|-------|---------------|----------|----------------|---------------------|--------------------|---------------------|------------------------|-----------------------|
| 12297   | 5944.5 | 0.6   | <b>5943.9</b> | 1.08E-09 | Actinobacteria | Actinobacteria      | Actinomycetales    | Microbacteriaceae   | -                      | -                     |
| 4318672 | 233.9  | 46.3  | <b>187.6</b>  | 0.0071   | Proteobacteria | Betaproteobacteria  | Neisseriales       | Neisseriaceae       | <i>Neisseria</i>       | -                     |
| 855912  | 34.5   | 1.4   | <b>33.1</b>   | 8.01E-23 | Fusobacteria   | Fusobacteria        | Fusobacteriales    | Fusobacteriaceae    | <i>Fusobacterium</i>   | -                     |
| 246528  | 103.4  | 73.0  | <b>30.4</b>   | 1.67E-08 | Proteobacteria | Gammaproteobacteria | Pseudomonadales    | Moraxellaceae       | <i>Moraxella</i>       | -                     |
| 3931    | 17.8   | 1.8   | <b>16.0</b>   | 3.35E-14 | Spirochaetes   | Spirochaetes        | Spirochaetales     | Spirochaetaceae     | <i>Treponema</i>       | -                     |
| 3860    | 13.5   | 0.8   | <b>12.8</b>   | 1.13E-09 | Spirochaetes   | Spirochaetes        | Spirochaetales     | Spirochaetaceae     | <i>Treponema</i>       | <i>amylovorum</i>     |
| 930422  | 13.0   | 1.9   | <b>11.1</b>   | 4.45E-10 | Proteobacteria | Gammaproteobacteria | Pseudomonadales    | Moraxellaceae       | <i>Moraxella</i>       | -                     |
| 114813  | 11.3   | 3.3   | <b>8.0</b>    | 2.30E-06 | Bacteroidetes  | Bacteroidia         | Bacteroidales      | Prevotellaceae      | <i>Prevotella</i>      | -                     |
| 4472050 | 7.3    | 2.0   | <b>5.3</b>    | 1.51E-14 | Actinobacteria | Actinobacteria      | Actinomycetales    | Actinomycetaceae    | -                      | -                     |
| 773109  | 5.6    | 1.4   | <b>4.3</b>    | 5.83E-08 | Tenericutes    | Mollicutes          | Mycoplasmatales    | Mycoplasmataceae    | <i>Mycoplasma</i>      | -                     |
| 4364176 | 2.4    | 1.5   | <b>0.9</b>    | 0.0821   | Firmicutes     | Erysipelotrichi     | Erysipelotrichales | Erysipelotrichaceae | <i>Sharpa</i>          | -                     |
| 1105876 | 1.3    | 2.1   | <b>-0.9</b>   | 0.0922   | Firmicutes     | Clostridia          | Clostridiales      | Veillonellaceae     | <i>Dialister</i>       | -                     |
| 148695  | 0.8    | 1.8   | <b>-1.0</b>   | 0.0848   | GN02           | BD1-5               | -                  | -                   | -                      | -                     |
| 23709   | 0.3    | 1.5   | <b>-1.3</b>   | 0.0520   | Bacteroidetes  | Bacteroidia         | Bacteroidales      | -                   | -                      | -                     |
| 4411875 | 5.3    | 6.6   | <b>-1.4</b>   | 0.0020   | Actinobacteria | Actinobacteria      | Bifidobacteriales  | Bifidobacteriaceae  | <i>Scardovia</i>       | -                     |
| 1465    | 1.3    | 3.5   | <b>-2.3</b>   | 1.34E-06 | Bacteroidetes  | Bacteroidia         | Bacteroidales      | Prevotellaceae      | <i>Prevotella</i>      | <i>intermedia</i>     |
| 62513   | 0.9    | 3.4   | <b>-2.5</b>   | 0.0699   | Firmicutes     | Clostridia          | Clostridiales      | Lachnospiraceae     | <i>Moryella</i>        | -                     |
| 495067  | 0.8    | 3.5   | <b>-2.8</b>   | 0.0539   | Actinobacteria | Actinobacteria      | Actinomycetales    | Corynebacteriaceae  | <i>Corynebacterium</i> | -                     |
| 4380570 | 1.0    | 3.9   | <b>-2.9</b>   | 0.0358   | Proteobacteria | Betaproteobacteria  | Neisseriales       | Neisseriaceae       | <i>Kingella</i>        | -                     |
| 645055  | 1.4    | 4.5   | <b>-3.1</b>   | 0.0293   | Fusobacteria   | Fusobacteria        | Fusobacteriales    | Fusobacteriaceae    | <i>Fusobacterium</i>   | -                     |
| 43339   | 1.0    | 4.5   | <b>-3.5</b>   | 0.0159   | Firmicutes     | Clostridia          | Clostridiales      | Mogibacteriaceae    | -                      | -                     |
| 422455  | 0.8    | 4.8   | <b>-4.0</b>   | 0.0020   | Tenericutes    | Mollicutes          | Acholeplasmatales  | Acholeplasmataceae  | <i>Acholeplasma</i>    | -                     |
| 1580    | 1.4    | 5.6   | <b>-4.3</b>   | 0.0111   | Bacteroidetes  | Bacteroidia         | Bacteroidales      | Prevotellaceae      | <i>Prevotella</i>      | <i>melaminogenica</i> |
| 399903  | 2.4    | 7.5   | <b>-5.1</b>   | 0.0009   | Spirochaetes   | Spirochaetes        | Spirochaetales     | Spirochaetaceae     | <i>Treponema</i>       | -                     |
| 4004098 | 1.8    | 7.6   | <b>-5.9</b>   | 5.69E-05 | Tenericutes    | RF3                 | ML615J-28          | -                   | -                      | -                     |

|         |      |       |               |           |               |              |                 |                       |                      |              |
|---------|------|-------|---------------|-----------|---------------|--------------|-----------------|-----------------------|----------------------|--------------|
| 130864  | 3.3  | 9.3   | <b>-6.0</b>   | 5.11E-12  | Firmicutes    | Bacilli      | Lactobacillales | Lactobacillaceae      | <i>Lactobacillus</i> | <i>iners</i> |
| 92316   | 1.3  | 9.6   | <b>-8.4</b>   | 0.0006    | Firmicutes    | Clostridia   | Clostridiales   | Lachnospiraceae       | -                    | -            |
| 4426165 | 2.3  | 10.9  | <b>-8.6</b>   | 1.25E-07  | Bacteroidetes | Bacteroidia  | Bacteroidales   | Prevotellaceae        | <i>Prevotella</i>    | -            |
| 893048  | 1.9  | 10.9  | <b>-9.0</b>   | 4.04E-08  | Firmicutes    | Clostridia   | Clostridiales   | -                     | -                    | -            |
| 1044611 | 10.4 | 29.9  | <b>-19.5</b>  | 3.10E-14  | Firmicutes    | Clostridia   | Clostridiales   | Peptostreptococcaceae | -                    | -            |
| 4421864 | 5.1  | 26.3  | <b>-21.1</b>  | 0.0597    | Firmicutes    | Clostridia   | Clostridiales   | Veillonellaceae       | <i>Selenomonas</i>   | -            |
| 398192  | 0.3  | 23.1  | <b>-22.9</b>  | 2.93E-06  | Bacteroidetes | Bacteroidia  | Bacteroidales   | Paraprevotellaceae    | <i>Prevotella</i>    | -            |
| 4440670 | 1.5  | 24.9  | <b>-23.4</b>  | 1.74E-18  | Firmicutes    | Clostridia   | Clostridiales   | Veillonellaceae       | <i>Veillonella</i>   | -            |
| 4318284 | 3.9  | 69.1  | <b>-65.3</b>  | 0.0359    | Firmicutes    | Clostridia   | Clostridiales   | Veillonellaceae       | <i>Dialister</i>     | -            |
| 2438396 | 12.5 | 123.5 | <b>-111.0</b> | 1.93E-102 | Fusobacteria  | Fusobacteria | Fusobacteriales | Fusobacteriaceae      | <i>Fusobacterium</i> | -            |

# mean relative abundance

## SUPPLEMENTAL METHODS:

### *Study Population and Sample Collection:*

Of 186 adults screened for eligibility at nine “AsthmaNet” clinical centers, 84 subjects were enrolled (**Figure S1A-C**). Each participating clinical center (Brigham and Women’s Hospital, Boston, MA; Northwestern University, Chicago, IL; National Jewish Health, Denver, CO; University of Wisconsin, Madison, WI; University of Pittsburgh, Pittsburgh, PA; Washington University, St. Louis, MO; University of California San Francisco, San Francisco, CA; Duke University, Durham, NC; Duke University, Durham, NC and Wake Forest University, Winston-Salem, NC) enrolled a median of 10 (IQR of 8-11) subjects of whom 50% (IQR of 39-64) were asthmatic. The study center was not a significant contributor to any of the differences in bacterial community composition reported in this study. Each subject signed informed consent approved by the center’s IRB, and an NHLBI-appointed Data Safety Monitoring Board (DSMB) oversaw the study conduct.

Adult subjects with mild atopic asthma (AA; n=42) were enrolled who had demonstrated serologic evidence of sensitivity ( $>0.35$  kU/l) to at least one of 12 aeroallergens (**Table S1**) identified using ImmunoCAP specific IgE test (Thermo scientific); and airway hyper-responsiveness (methacholine PC<sub>20</sub>  $\leq 8$  mg/mL), or bronchodilator reversibility (FEV<sub>1</sub> improvement  $\geq 12\%$  in response to albuterol). Asthmatic subjects had stable asthma for preceding 3 months, an Asthma Control Questionnaire (ACQ) score of  $<1.5$  (1) and no use of a controller medication (such as an inhaled corticosteroid) in the preceding 6 months. Atopic non-asthmatic subjects (ANA; n=21) had sensitivity to at least one aeroallergen but no evidence of airway hyper-responsiveness, (PC<sub>20</sub>  $>16$  mg/mL) or bronchodilator reversibility, and no history of chronic sinusitis (for responses to additional prior clinical conditions and environmental exposure for AA and ANA subjects see **Tables S2-S3**). Healthy control subjects (HC; n=21) had no history of atopic symptoms, negative serologic tests for all aeroallergens tested, and no history of chronic respiratory or other disease. Exclusion criteria for all subjects included smoking, symptoms of respiratory tract infection (including acute sinusitis and bronchitis) in the previous 6 weeks, and antibiotic use in the previous 3 months.

All subjects underwent spirometry, blood sampling, and sputum induction at visit 1 (**Figure S1C**). At visit 2, prior to bronchoscopy, oral wash samples (OW) consisting of a tongue scraping followed by oral rinse and gargle with sterile saline (10 mL), were collected as previously described (2). To evaluate for instrument carryover of oral bacterial DNA contamination during sample collection, a 10mL flush of sterile saline through the suction channel of the bronchoscope (“scope flush”) was collected following application of topical anesthesia to the vocal cords when the instrument was withdrawn before proceeding to collection of 4 protected bronchial brush (BB) samples as described previously (3). Asthmatic subjects were subsequently randomized in a 2:1 ratio to treatment with inhaled fluticasone propionate (250 mcg; GlaxoSmithKline) or placebo (lactose alone) from a dry powder inhaler twice daily for six weeks. Repeat assessments were then performed (visits 3 and 4). All samples intended for microbial analysis were stored in RNA<sub>later</sub> (Ambion, Inc. Austin, TX) at  $-80^{\circ}\text{C}$  until processing.

### *Nucleic acid extraction:*

For the focus of this study, nucleic acids from OW and 3 BB’s were extracted as previously described (2, 3) using a bead-beating protocol and the AllPrep kit (Qiagen, CA), to purify DNA and RNA in parallel. Reagent controls including 10mL aliquots of the lidocaine and sterile saline used during bronchoscopy, and from “scope flush” samples were extracted for DNA and tested by quantitative PCR (Q-PCR) using universal bacterial primers (see below) for bacterial contamination, with all reagents demonstrating no evidence of significant bacterial contamination

(<35 16S rRNA gene copy number). Each extraction batch also included a blank control; these went through all the steps in preparation for 16S rRNA sequencing (as described below) and were sequenced. DNA and RNA were quantified on a NanoDrop2000 (ThermoFisher, CA).

*Quantitation of 16S rRNA and  $\beta$ -actin copy number:*

16S rRNA gene copy number was assessed by quantitative PCR (Q-PCR) using the 16S rRNA universal primers P891F, P1033R and TaqMan UniProbe as previously described (4) in triplicate using TaqMan Universal Master Mix (Life Technologies). Mammalian  $\beta$ -actin copy numbers were evaluated using primers bActin-F (5'- CCTGGCACCCAGCACAAT-3') and bActin-R (5'- GCCGATCCACACGGAGTACT-3') and bActin-TMP probe (5-FAM/ TCAAGATCATTGCTCCTCCTGAGCGC/3BHQ) (5). Total 16S rRNA and  $\beta$ -actin copy number was calculated against a standard curve of known 16SrRNA or  $\beta$ -actin copy numbers ( $1 \times 10^2$  –  $1 \times 10^8$ ). Regression coefficients for all standard curves were > 0.98.

*16S rRNA-based airway and oral microbiota profiling using Illumina MiSeq:*

The variable region 4 (V4) of the 16S rRNA gene was amplified using 10 ng/ $\mu$ l of OW and 100 ng/ $\mu$ l of BB DNA template and 515F/806R primer combination as previously described (6, 7). Those samples without visible evidence of 16s rRNA PCR product on the first screen underwent repeat PCR screening with a bacterial-DNA control to rule out presence of sample-specific PCR inhibition. Amplicons were purified using SPRI beads (Beckman Coulter) or in the presence of multiple bands, gel-extracted with a Qiagen Gel Extraction kit (Qiagen) per manufacturer protocol, analyzed on Bioanalyzer (Aligent), quantified using the Qubit HS dsDNA kit (Invitrogen). Samples with amplicons <10ng were not sequenced. Blank control DNA extracts were also amplified, bead purified and included in each MiSeq run. Samples with sufficient 16S rRNA amplicon were pooled at 50 ng per sample, with 30-35 samples and a blank control. The barcoded, pooled library was quantified using the Qubit HS dsDNA kit (Invitrogen), denatured and 5pM was loaded onto the Illumina MiSeq cartridge (V3) in combination with a 15% (v/v) of denatured 12.5pM PhiX for sequencing.

Paired-end sequences were combined using FLASH version 1.2.7 (8). Sequence analysis was performed using the Quantitative Insights into Microbial Ecology (QIIME) pipeline version 1.8.0 (9). Raw sequences were de-multiplexed by barcode and quality filtered by removing low quality sequences. Sequences with three or more consecutive bases with a Q score < 30 were truncated and discarded if the length was less than 75% of the original 250 bp read length. Sequences were aligned using PyNAST (10) and operational taxonomic units (OTUs) were picked at 97% sequence identity using uclust against the latest release of the Greengenes database (13\_5) (11, 12). Reads that failed to hit the reference sequence collection were retained and clustered de novo. PyNAST-aligned sequences were chimera checked using ChimeraSlayer and putative chimeras as well as OTUs identified in negative controls or where not from kingdom Bacteria were removed from the OTU table. A phylogenetic tree was built using FastTree (13) and used to compute Faith's Phylogenetic Diversity on OTU table multiply rarefied 100 times to 52,317 sequences per sample.

*Statistical analysis:*

All statistical analysis was performed as indicated in QIIME (9), R environment or using PRISM software. Welch's corrected t-test, Kruskal-Wallis or Wilcoxon rank sum test and Chi-square or Fisher's exact test where appropriate were used to determine significant differences in metadata between study groups conducted in PRISM. Ordination was visualized using Principle Coordinates Analysis (PCoA) on unweighted UniFrac distance matrix and plotted using Emperor in QIIME (14). Significant differences in beta-diversity between paired OW and BB samples were calculated on unweighted UniFrac PC1 coordinates (as a response variable) using Linear mixed

effects (LME) model ((15) using *lmerTest* package in R). PERMANOVA ((16); *vegan* package function *Adonis* in R) was used to evaluate significant differences in beta-diversity between groups of independent samples. Negative binomial (NB) regression model (17, 18) was used to identify specific OTUs (present in at least 3 samples) that differed in relative abundance between groups of subjects. Only OTUs having a false discovery (FDR) corrected using Benjamini Hochberg method, q-value of <0.1, were retained and declared as significantly differentially enriched taxa. Pearson correlations were performed to determine relationships between relative abundance of OTUs and study variables with q-value correction for false discovery. Phylogenetic tree constructed with taxa of interest in QIIME were annotated using Interactive tree of Life (19). Metagenome prediction from normalized 16S rRNA representative sequences was performed using PICRUSt (20). NB regression model with Benjamini Hochberg FDR correction for multiple comparisons was used to determine Kyoto Encyclopedia of Genes and Genomes (KEGG) gene orthologs (KO's) that were significantly enriched in each group of interest. Zero-inflated negative binomial (ZINB) model (21,22) corrected for false discovery (Benjamini Hochberg, q-value of <0.1) was used to identify specific OTUs in paired samples before and after treatment with ICS or placebo inhaler. Procrustes analysis (23) based on unweighted UniFrac distance was used to compare community composition between paired samples in each treatment group.

**ACKNOWLEDGEMENTS:**

We additionally would like to thank the following coordinators and staff, and to identify the grants supporting the study: Robert Pedicini, BS<sup>1</sup>; Kathy Zheng, MPH<sup>1</sup>; Duanny Alva, MPH<sup>2</sup>; Assel Biyasheva, PhD<sup>2</sup>; Jenny Hixon, BS, CCRC<sup>2</sup>; Lucius Robinson III, BS, CMA, CCRC<sup>2</sup>; Mary Gill, RN, BSN<sup>3</sup>; James T. Good, MD<sup>3</sup>; Christena Kolakowski, MS<sup>3</sup>; Allen Stevens, CCRC, NREMT<sup>3</sup>; E. Rand Sutherland, MD<sup>3</sup>; Julia Bach, RN<sup>4</sup>; Rich Cornwell, MD<sup>4</sup>; Holly Eversoll, RN<sup>4</sup>; Tiffany Huard<sup>4</sup>; Keith Meyer, MD<sup>4</sup>; Barbara Miller, RN<sup>4</sup>; Ann Sexton, MPH<sup>4</sup>; Michele Wolff, RN<sup>4</sup>; Merritt Fajt, MD<sup>5</sup>; Sherri Hill, BS<sup>5</sup>; Lisa Lane, BS<sup>5</sup>; Russell Traister, MD<sup>5</sup>; Cathy Vitari, RN, BSN AE-C<sup>5</sup>; Vanessa Curtis, RRT<sup>6</sup>; Brenda Patterson, RN, APN<sup>6</sup>; Cheryl Shelton, RN, BSN<sup>6</sup>; Kelly Norsworthy, BA, CPT<sup>7</sup>; Kelsey Wollen, BA<sup>7</sup>; Eugene Bleeker, MD<sup>8</sup>; Christopher Barrios, MD<sup>8</sup>; Suzan Farris, CCRP<sup>8</sup>; Jeffrey Krings, FNP<sup>8</sup>; Victor Ortega, MD<sup>8</sup>; Cheryl Wilmoth, CCRP<sup>8</sup>; Matthew Bowman, BS<sup>9</sup>; Linda Engle, BS<sup>9</sup>; Jennifer Lucier, BS<sup>9</sup>; Aimee J. Merchlinski, MS<sup>9</sup>; Kathryn Trasatt, BS<sup>9</sup>; Angela Updegrave<sup>9</sup>; Rachel Weber, BS<sup>9</sup>; Ronald R. Zimmerman, Jr., MPA<sup>9</sup>

<sup>1</sup>Brigham & Women's Hospital, Boston, MA (Grant: HL098102); <sup>2</sup>Northwestern University, Chicago, IL (Grant: HL098096); <sup>3</sup>National Jewish Health; Denver, CO (Grant: HL098075 & TR001082); <sup>4</sup>University of Wisconsin Madison, Madison, WI (Grant: HL098090); <sup>5</sup>University of Pittsburgh, Pittsburgh, PA (Grant: HL098177); <sup>6</sup>Washington University, St. Louis, MO (Grant: HL098098 & TR000448); <sup>7</sup>University of California San Francisco, San Francisco, CA (Grant: HL098107 & HL105572); <sup>8</sup>Wake Forest University, Winston-Salem, NC (Grant: HL098103 & TR000454); <sup>9</sup>Pennsylvania State University, Hershey, PA (Grant: HL098115)



## SUPPLEMENTAL MATERIAL REFERENCES:

1. Juniper EF, O'Byrne PM, Guyatt GH, Ferrier PJ, King DR. 1999. Development and validation of a questionnaire to measure asthma control. *Eur Respir J*. **14**:902-907.
2. Iwai S, Fei M, Huang D, Fong S, Subramanian A, Grieco K, Lynch SV, Huang L. 2012. Oral and Airway Microbiota in HIV-Infected Pneumonia Patients. *J. Clin. Microbiol.* **50**:2995-3002.
3. Huang YJ, Nelson CE, Brodie EL, Desantis TZ, Baek MS, Liu J, Woyke T, Allgaier M, Bristow J, Wiener-Kronish JP, Sutherland ER, King TS, Icitovic N, Martin RJ, Calhoun WJ, Castro M, Denlinger LC, Dimango E, Kraft M, Peters SP, Wasserman SI, Wechsler ME, Boushey HA, Lynch SV. 2011. Airway microbiota and bronchial hyperresponsiveness in patients with suboptimally controlled asthma. *J. Allergy Clin. Immunol.* **127**:372-381.e371-373.
4. Iwai S, Huang D, Fong S, Jarlsberg LG, Worodria W, Yoo S, Cattamanchi A, Davis JL, Kaswabuli S, Segal M, Huang L, Lynch SV. 2014. The Lung Microbiome of Ugandan HIV-Infected Pneumonia Patients Is Compositionally and Functionally Distinct from That of San Franciscan Patients. *PLoSone* **9**:e95726.
5. Bhakta NR, Solberg OD, Nguyen CP, Nguyen CN, Arron JR, Fahy JV, Woodruff PG. 2013. A qPCR-based metric of Th2 airway inflammation in asthma. *Clin. Transl. Allergy* **3**:24.
6. Caporaso JG, Lauber CL, Walters WA, Berg-Lyons D, Huntley J, Fierer N, Owens SM, Betley J, Fraser L, Bauer M, Gormley N, Gilbert JA, Smith G, Knight R. 2012. Ultra-high-throughput microbial community analysis on the Illumina HiSeq and MiSeq platforms. *The ISME Journal* **6**:1621-1624.
7. Caporaso JG, Lauber CL, Walters WA, Berg-Lyons D, Lozupone CA, Turnbaugh PJ, Fierer N, Knight R. 2011. Global patterns of 16S rRNA diversity at a depth of millions of sequences per sample. *Proceedings of the National Academy of Sciences of the United States of America* **108** **Suppl 1**:4516-4522.
8. Magoc T, Salzberg SL. 2011. FLASH: fast length adjustment of short reads to improve genome assemblies. *Bioinformatics* **27**:2957-2963.
9. Caporaso JG, Kuczynski J, Stombaugh J, Bittinger K, Bushman FD, Costello EK, Fierer N, Pena AG, Goodrich JK, Gordon JI, Huttley GA, Kelley ST, Knights D, Koenig JE, Ley RE, Lozupone CA, McDonald D, Muegge BD, Pirrung M, Reeder J, Sevinsky JR, Turnbaugh PJ, Walters WA, Widmann J, Yatsunencko T, Zaneveld J, Knight R. 2010. QIIME allows analysis of high-throughput community sequencing data. *Nature methods* **7**:335-336.
10. Caporaso JG, Bittinger K, Bushman FD, DeSantis TZ, Andersen GL, Knight R. 2010. PyNAST: a flexible tool for aligning sequences to a template alignment. *Bioinformatics* **26**:266-267.
11. DeSantis TZ, Hugenholtz P, Larsen N, Rojas M, Brodie EL, Keller K, Huber T, Dalevi D, Hu P, Andersen GL. 2006. Greengenes, a chimera-checked 16S rRNA gene database and workbench compatible with ARB. *Applied and environmental microbiology* **72**:5069-5072.
12. Edgar RC. 2010. Search and clustering orders of magnitude faster than BLAST. *Bioinformatics* **26**:2460-2461.
13. Price MN, Dehal PS, Arkin AP. 2009. FastTree: Computing Large Minimum Evolution Trees with Profiles instead of a Distance Matrix. *Molecular Biology and Evolution* **26**:1641-1650.
14. Vazquez-Baeza Y, Pirrung M, Gonzalez A, Knight R. 2013. EMPPeror: a tool for visualizing high-throughput microbial community data. *GigaScience* **2**:16.
15. Pinheiro JC. 2005. Linear Mixed Effects Models for Longitudinal Data, *Encyclopedia of Biostatistics*. John Wiley & Sons, Ltd.
16. Anderson MJ. 2001. A new method for non-parametric multivariate analysis of variance. *Austral Ecology* **26**:32-46.
17. Gerber GK, Onderdonk AB, Bry L. 2012. Inferring dynamic signatures of microbes in complex host ecosystems. *PLoS computational biology* **8**:e1002624.
18. McMurdie PJ, Holmes S. 2014. Waste Not, Want Not: Why Rarefying Microbiome Data Is Inadmissible. *PLoS computational biology* **10**:e1003531.
19. Letunic I, Bork P. 2007. Interactive Tree Of Life (iTOL): an online tool for phylogenetic tree display and annotation. *Bioinformatics* **23**:127-128.
20. Langille MGI, Zaneveld J, Caporaso JG, McDonald D, Knights D, Reyes JA, Clemente JC, Burkpile DE, Vega Thurber RL, Knight R, Beiko RG, Huttenhower C. 2013. Predictive functional

- profiling of microbial communities using 16S rRNA marker gene sequences. *Nat Biotech* 31:814-821.
21. Kassahun W, Neyens T, Molenberghs G, Faes C, Verbeke G. 2014. Marginalized multilevel hurdle and zero-inflated models for overdispersed and correlated count data with excess zeros. *Statistics in medicine* 33:4402-4419.
  22. Min Y, Agresti A. 2005. Random effect models for repeated measures of zero-inflated count data. *Statistical Modelling* 5:1-19.
  23. Caporaso JG, Lauber CL, Walters WA, Berg-Lyons D, Huntley J, Fierer N, Owens SM, Betley J, Fraser L, Bauer M, Gormley N, Gilbert JA, Smith G, Knight R. 2012. Ultra-high-throughput microbial community analysis on the Illumina HiSeq and MiSeq platforms. *ISME J* 6: 1621-1624.

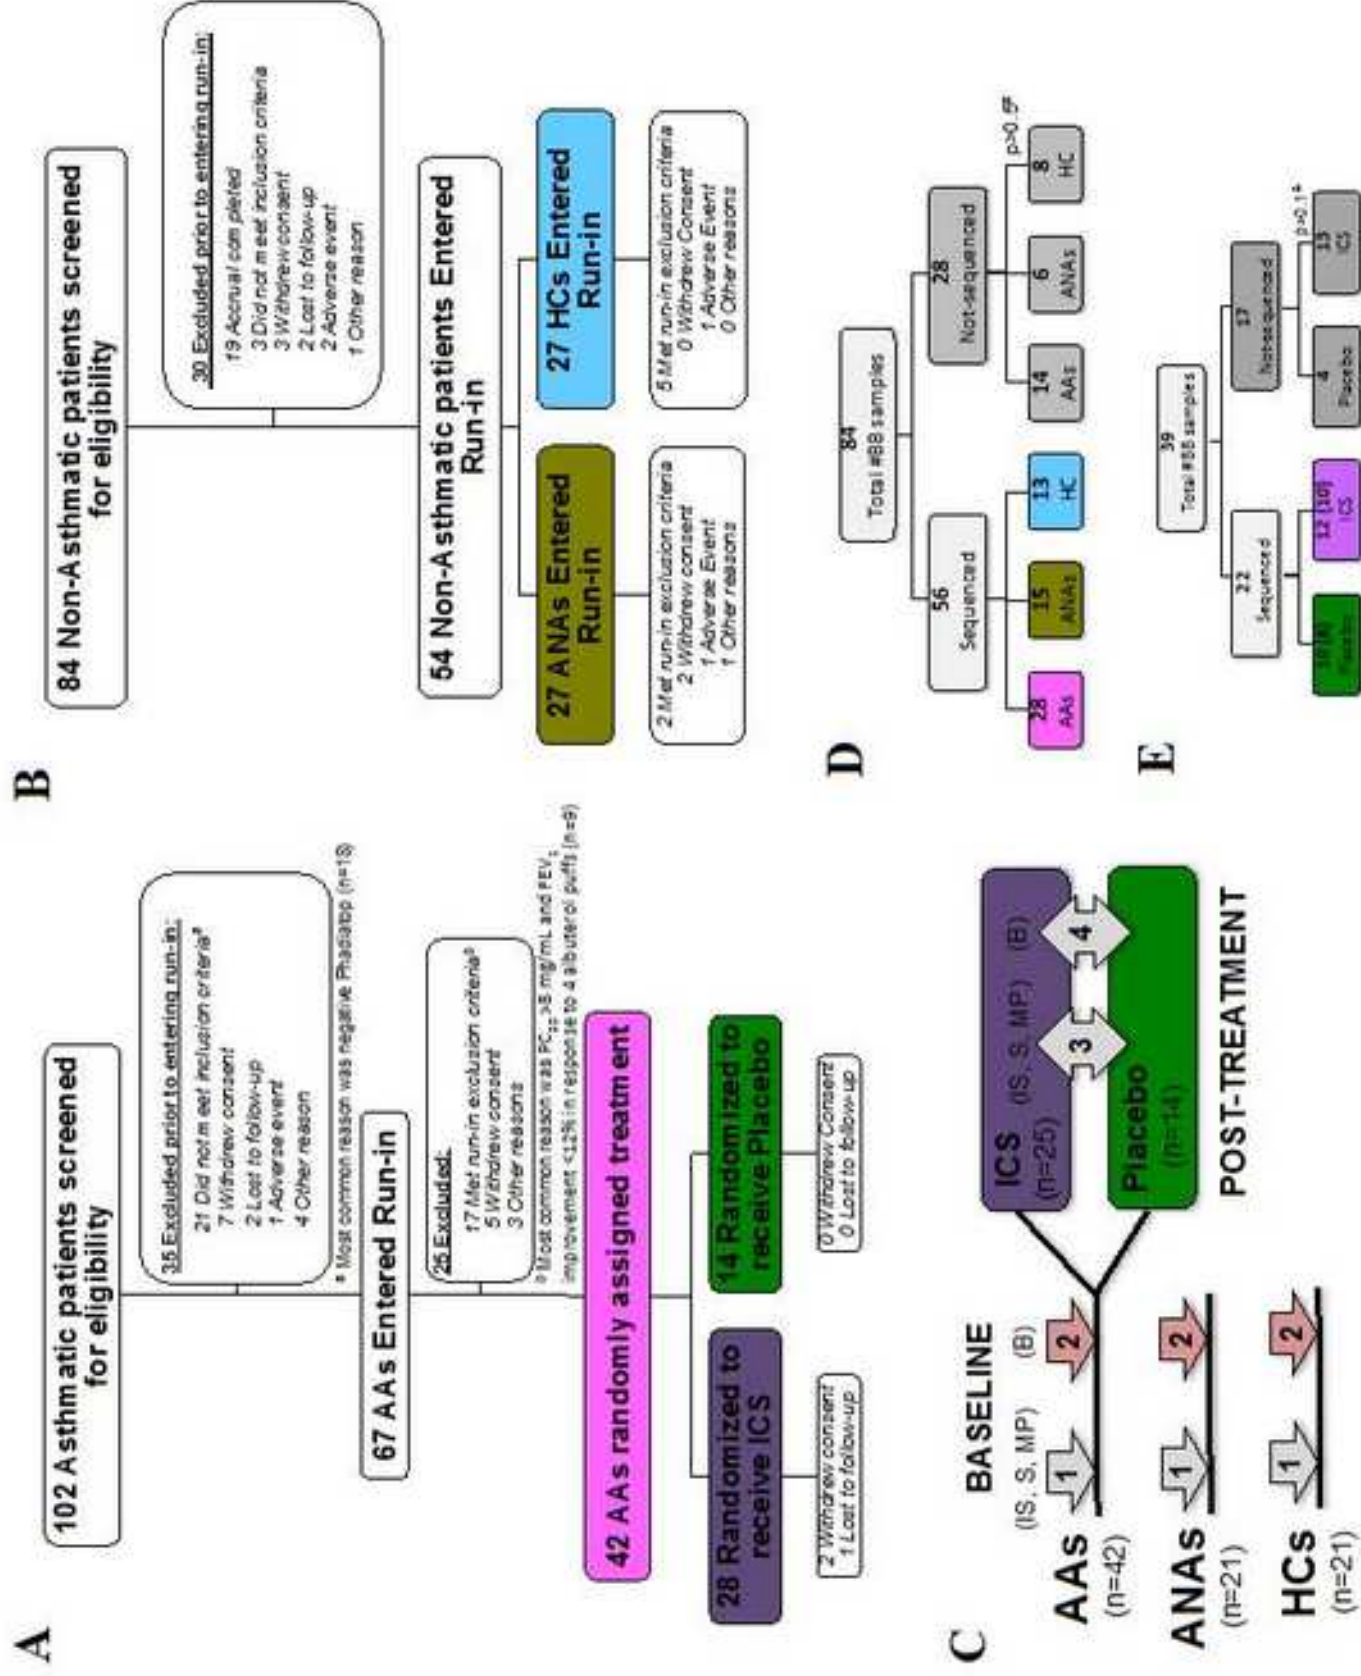

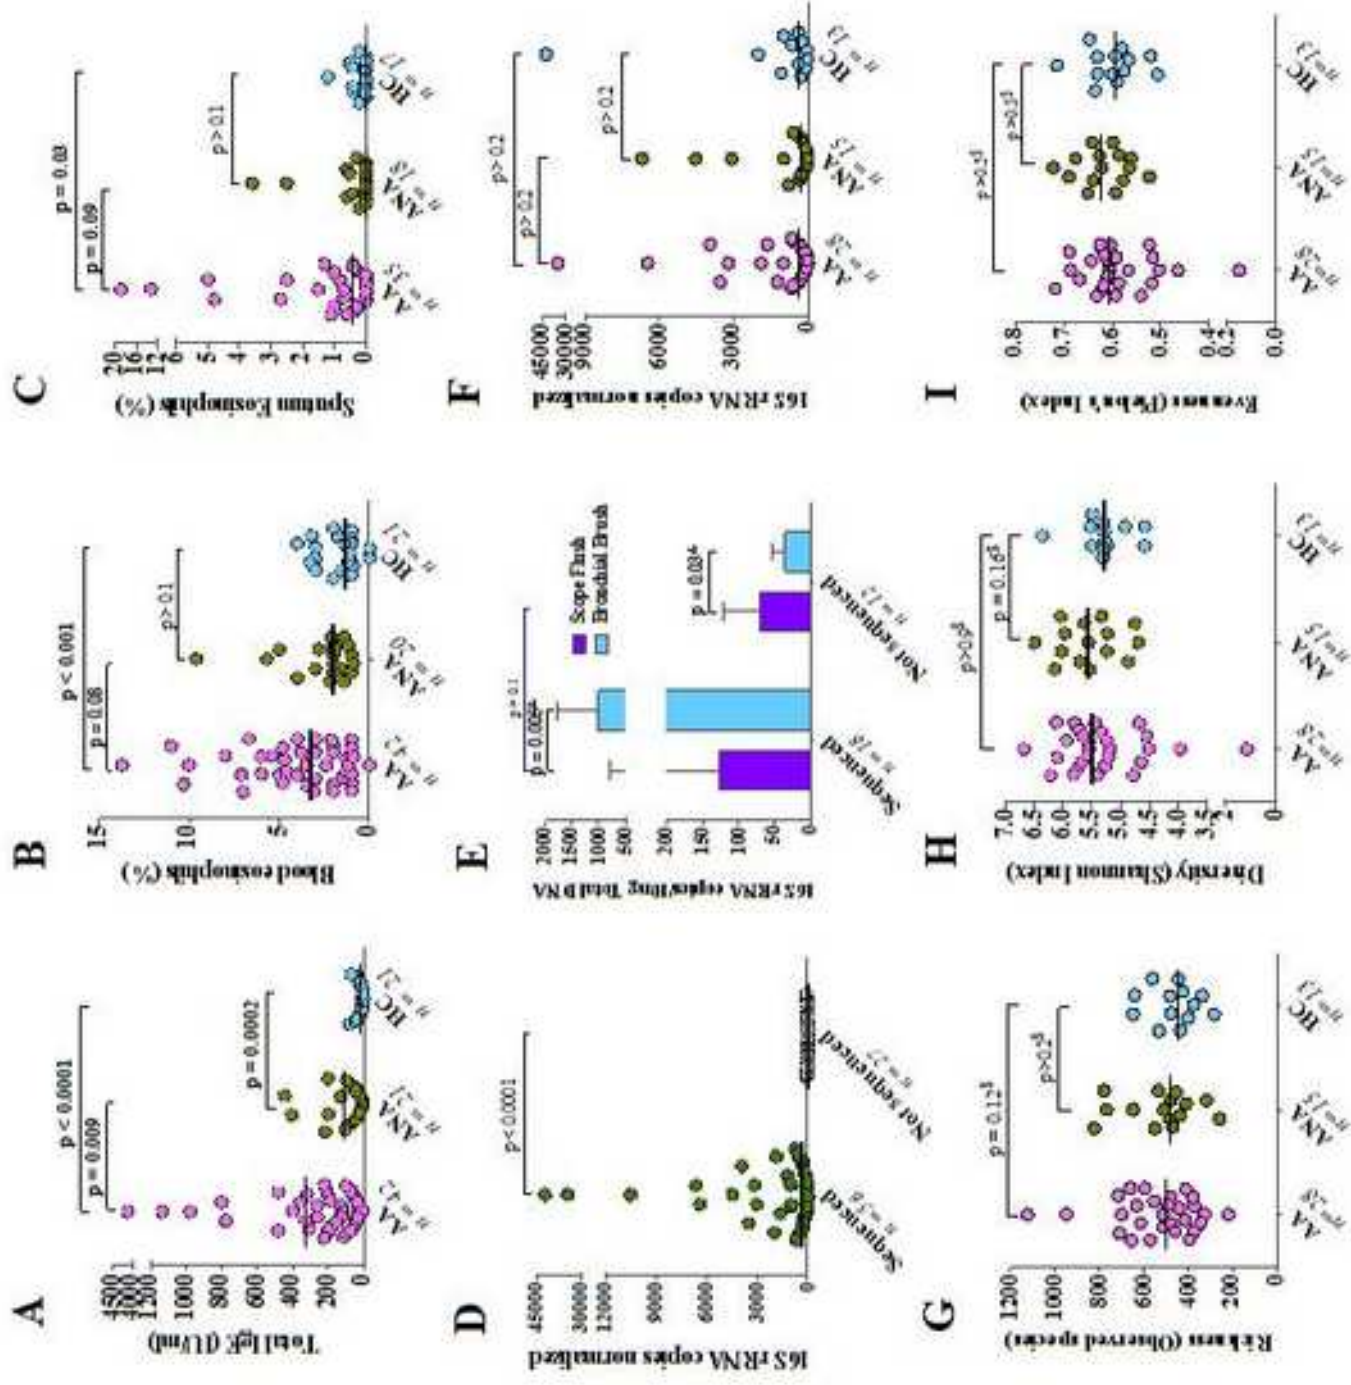

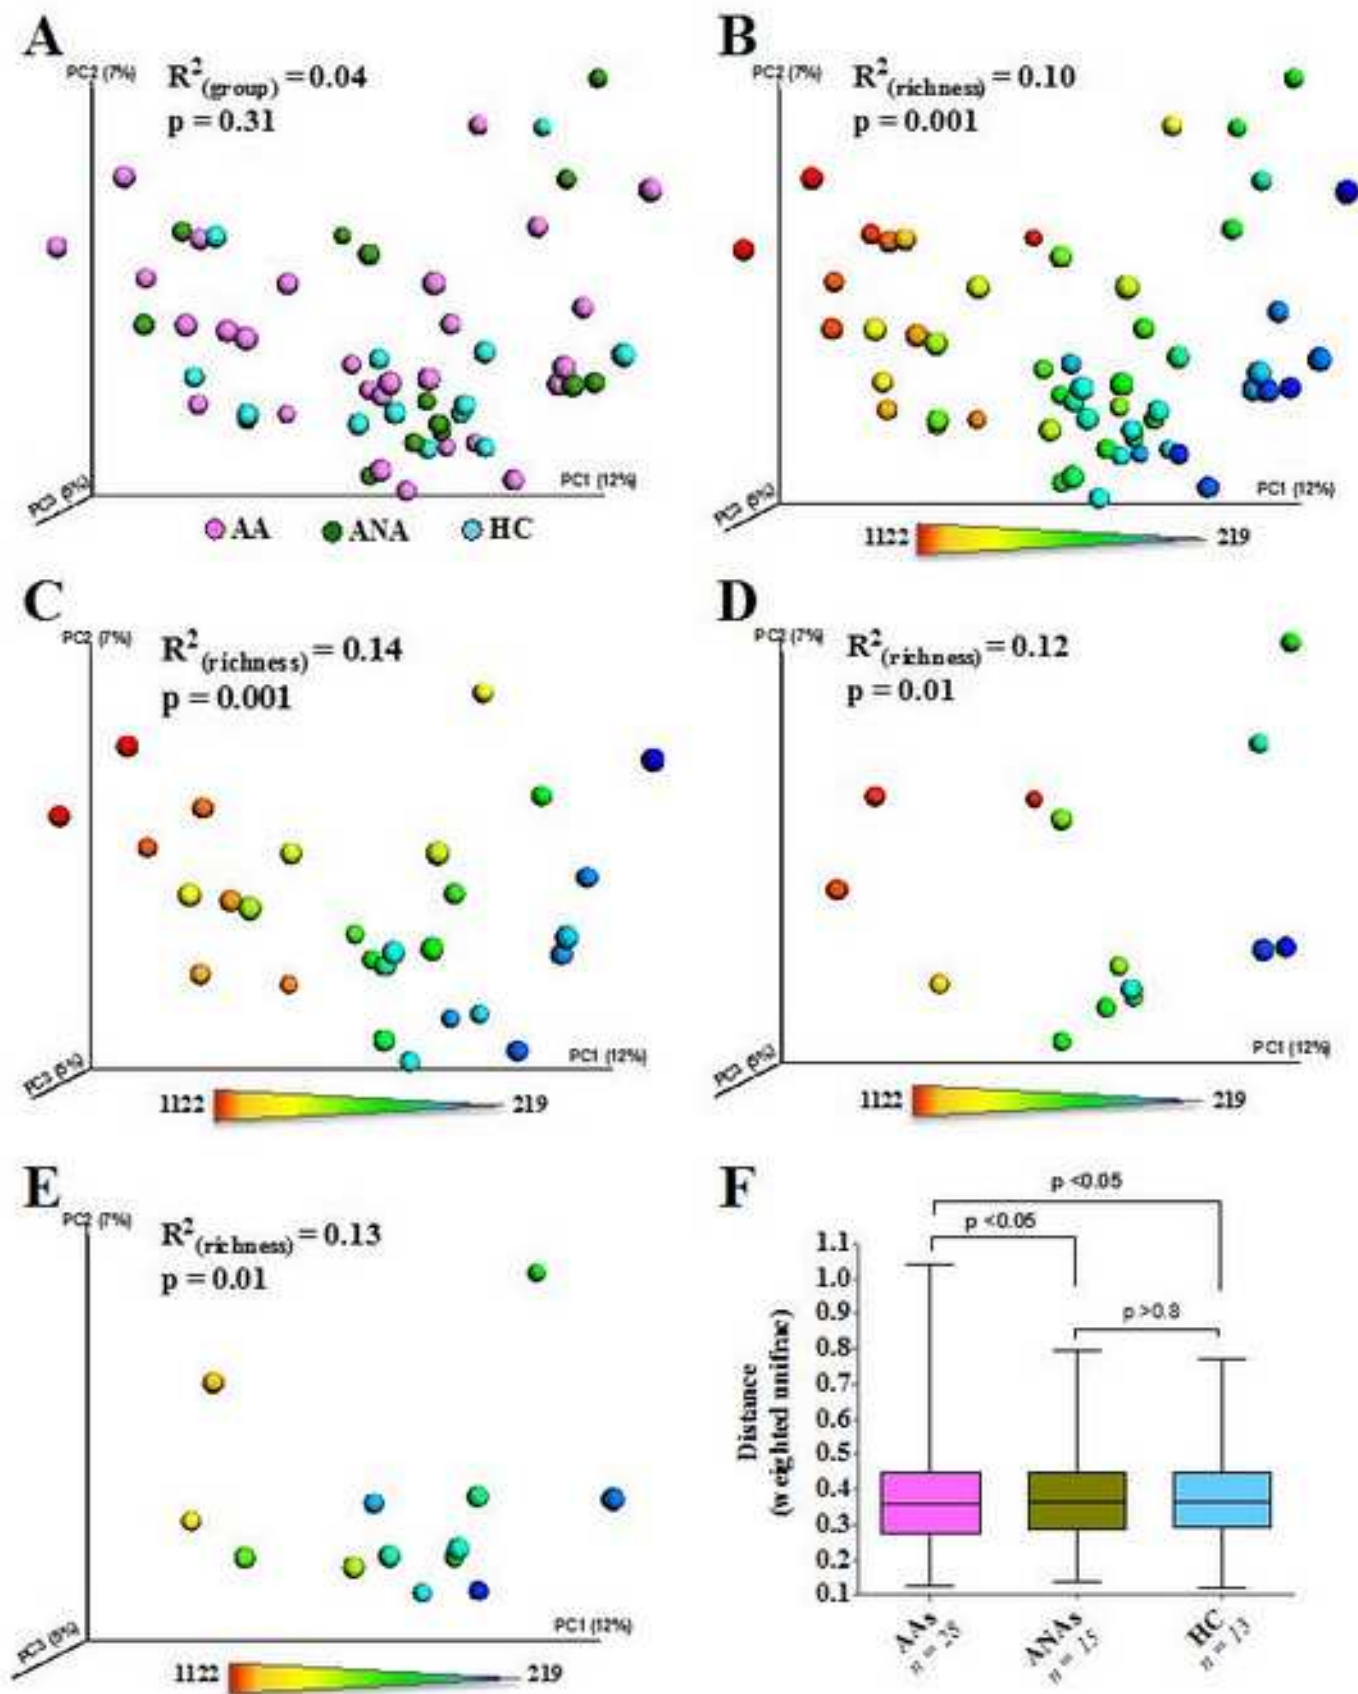

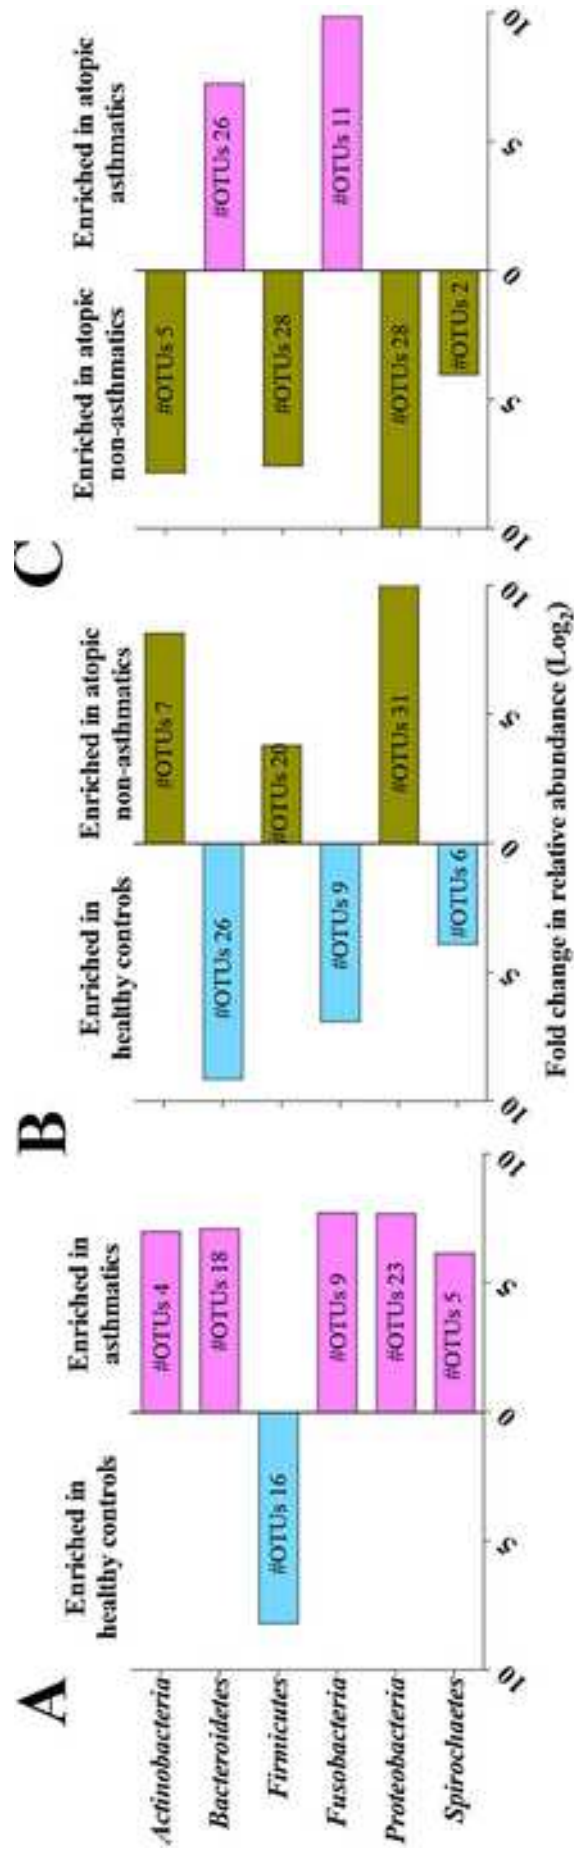

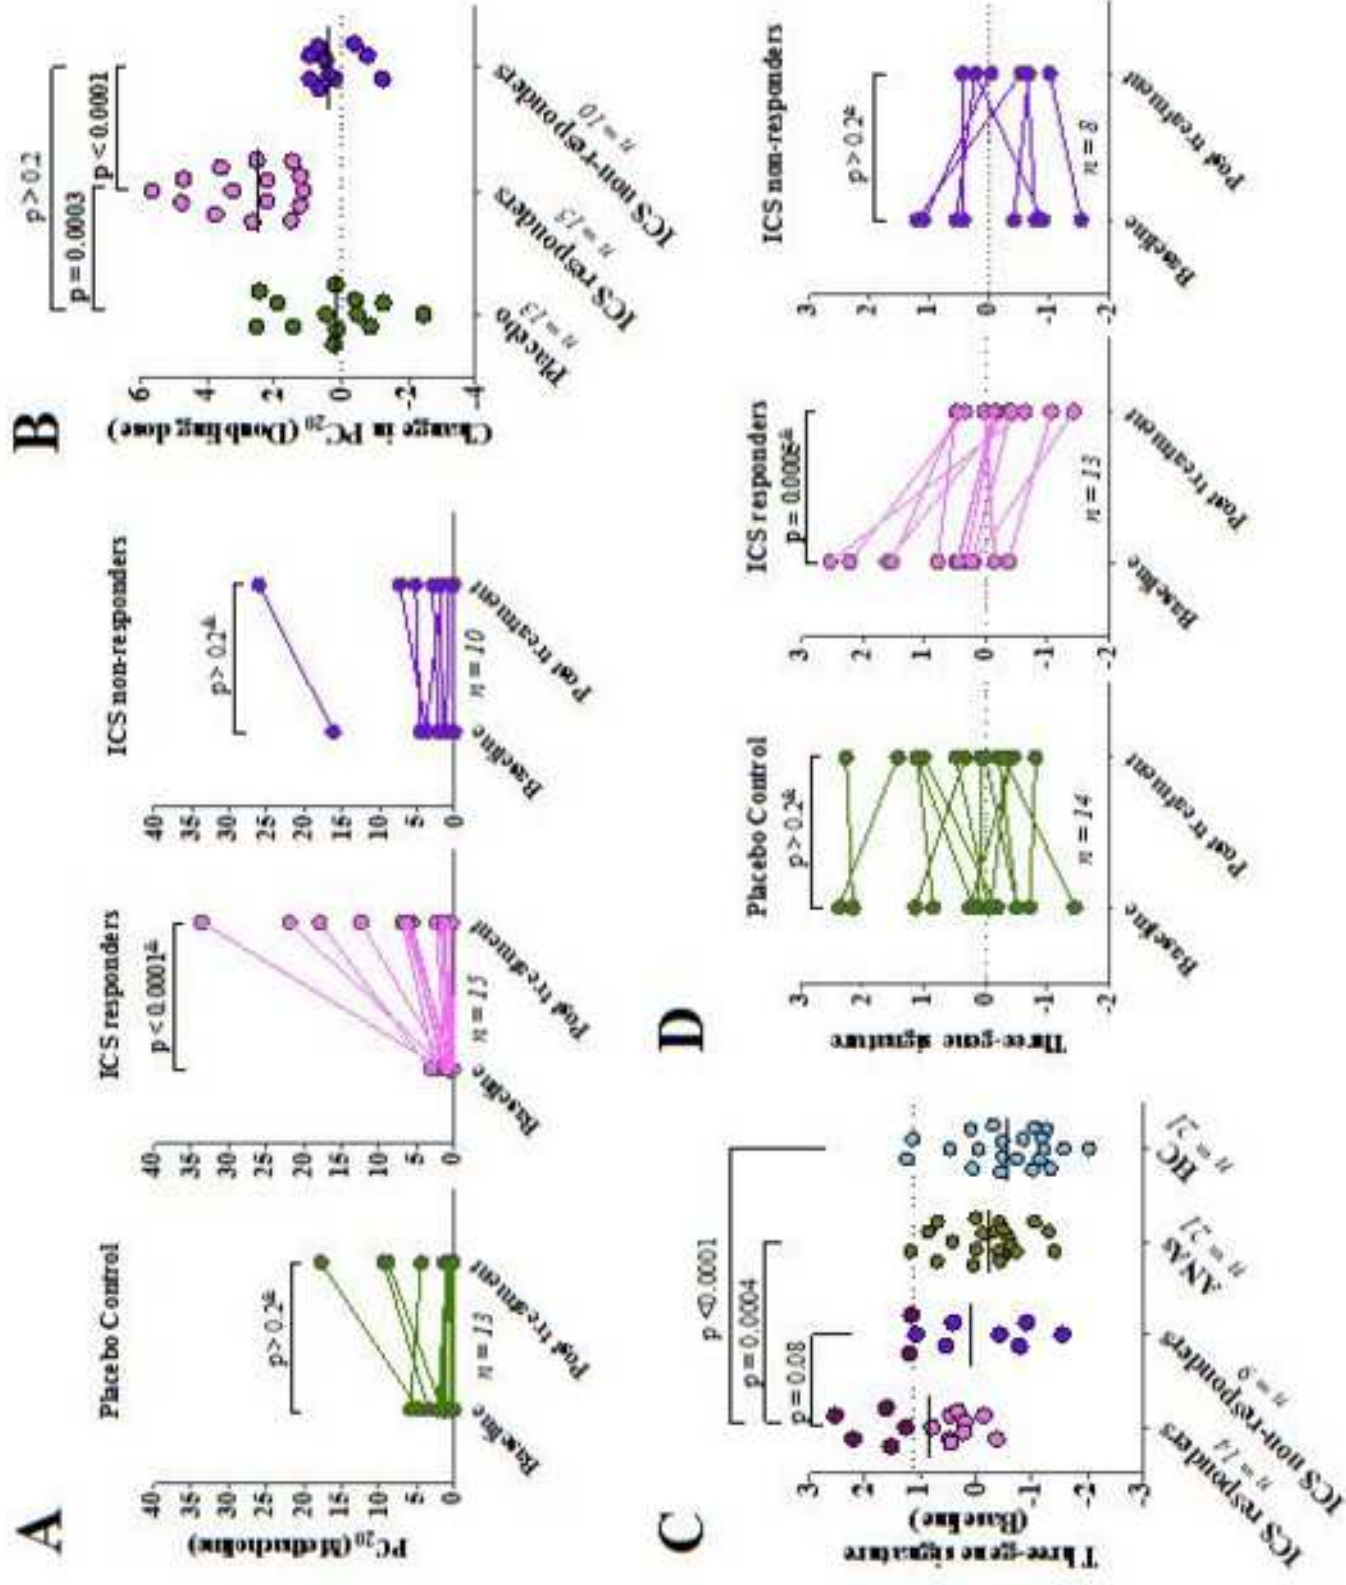

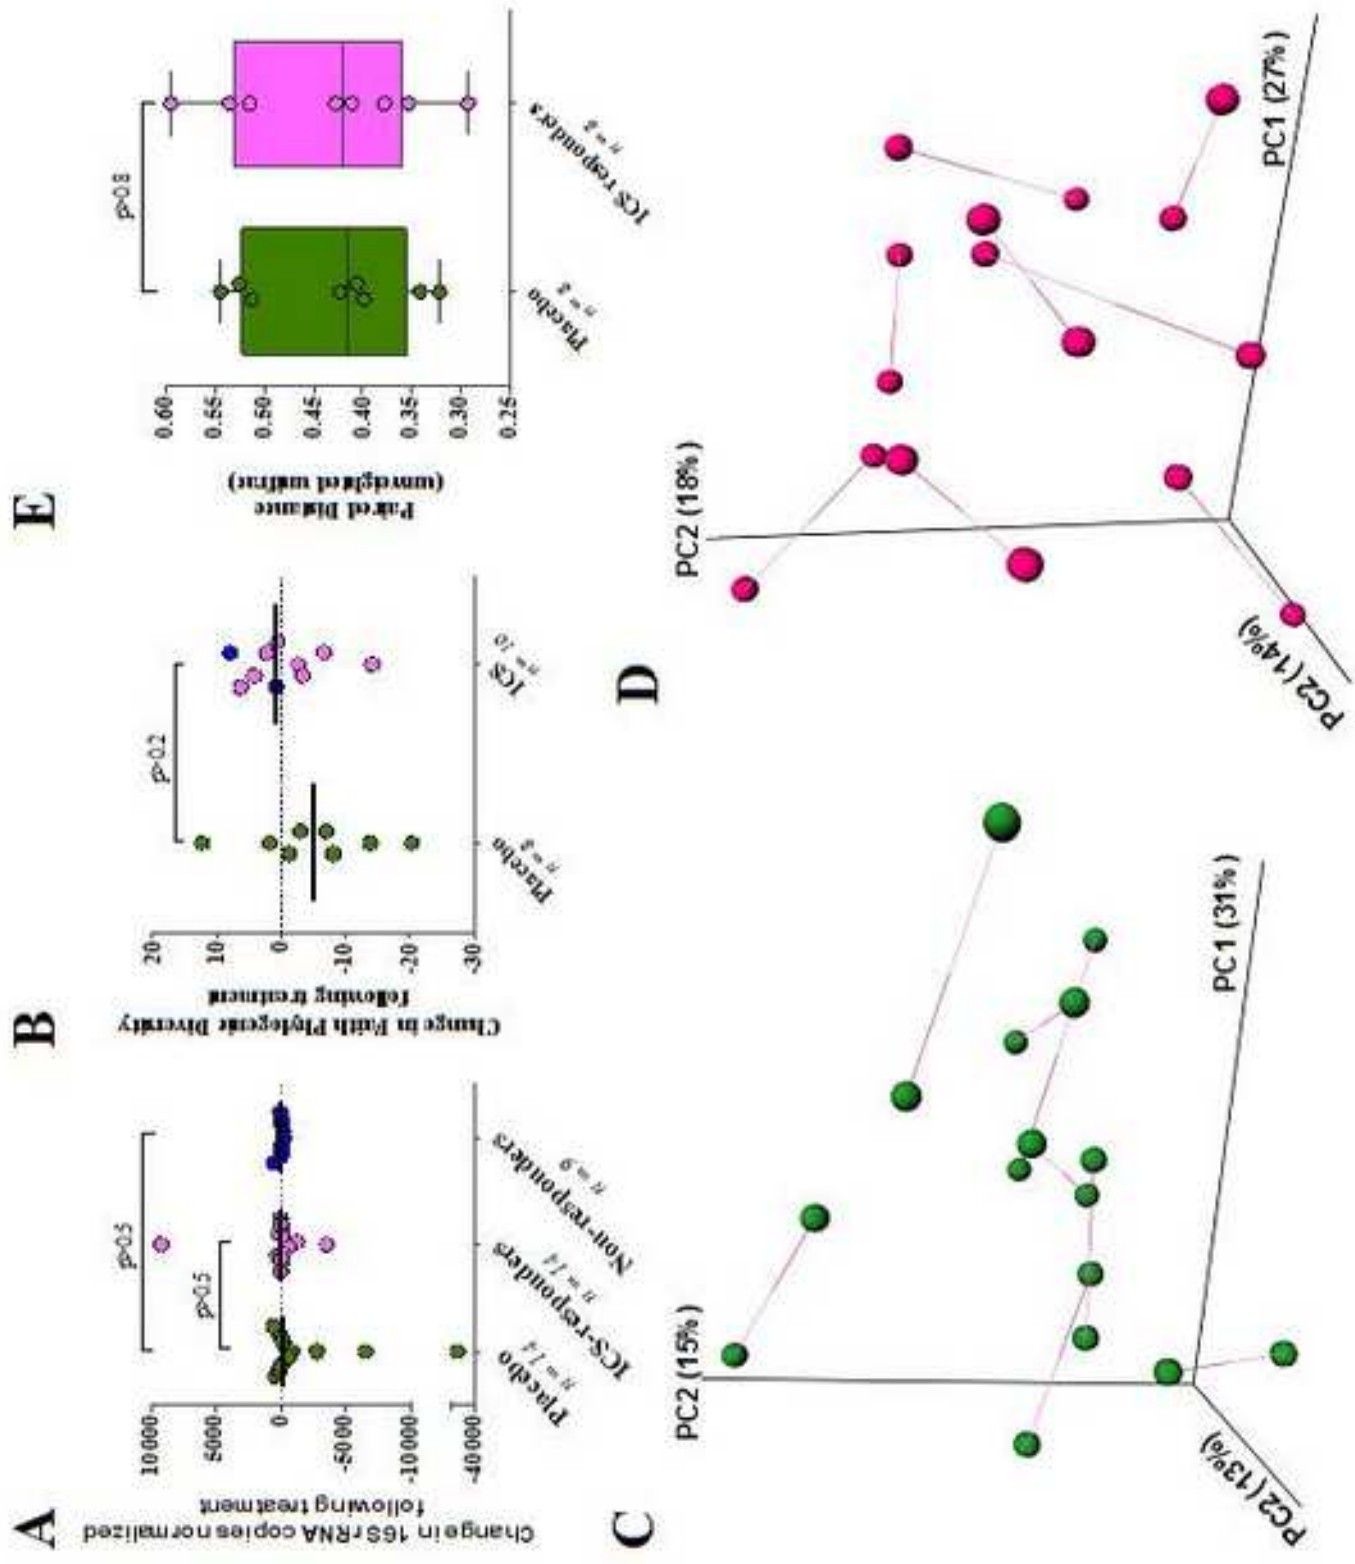



## Study Design

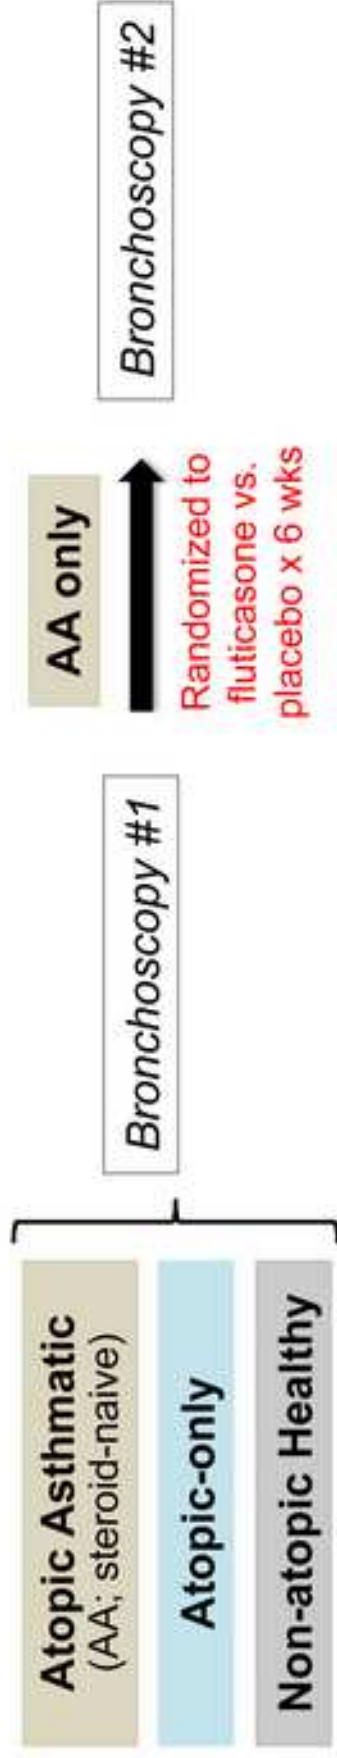

## Findings: Asthma-associated differences in the bronchial bacterial microbiome

### ① Compositional differences in members of:

- *Fusobacterium*
- *Haemophilus*
- *Neisseria*
- *Sphingomonadaceae*
- *Lactobacillales*

### ② Differences in predicted bacterial functions:

- Amino acid and carbohydrate metabolism

### ③ Lower bacterial burden in T2-high asthma

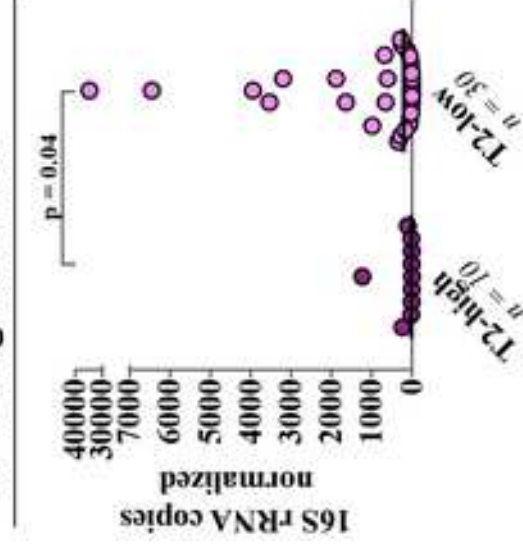

### ④ Response to fluticasone linked to baseline features of bronchial microbiota

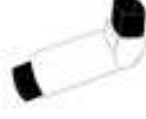

Supplement: NIHMS860191-supplement-Supplemental_Material.pdf [file NIHMS860191-supplement-Supplemental_Material.pdf]
